# Supplementary material for: Germline polymorphisms in an enhancer of PSIP1 are associated with progression-free survival in epithelial ovarian cancer
Source: PubMed Central journal article supplement (PMC4872719; doi:10.18632/oncotarget.7047), 2016-01-31
Supplement: oncotarget-07-6353-s001.pdf [file oncotarget-07-6353-s001.pdf]

## Germline polymorphisms in an enhancer of *PSIP1* are associated with progression-free survival in epithelial ovarian cancer

### Supplementary Material

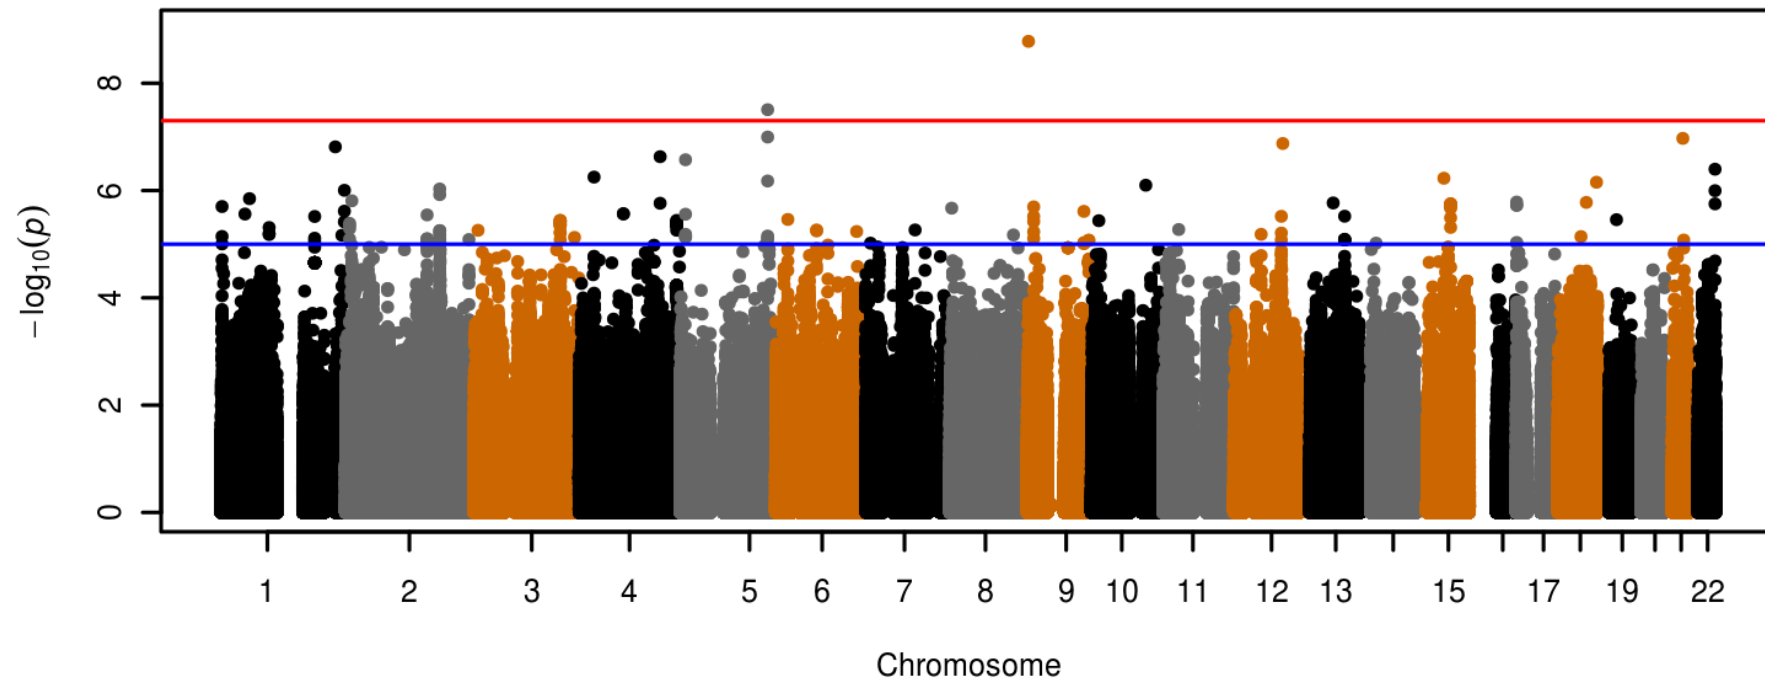

**Supplementary Figure 1. Manhattan plot of SNPs associated with progression-free survival (PFS) in Phase 1.** Association results ( $-\log_{10}$  P-values) are plotted for each chromosome. The red line marks the genome-wide significance ( $P=5 \times 10^{-8}$ ) and the blue line marks the suggestive significance ( $P=1 \times 10^{-5}$ ).

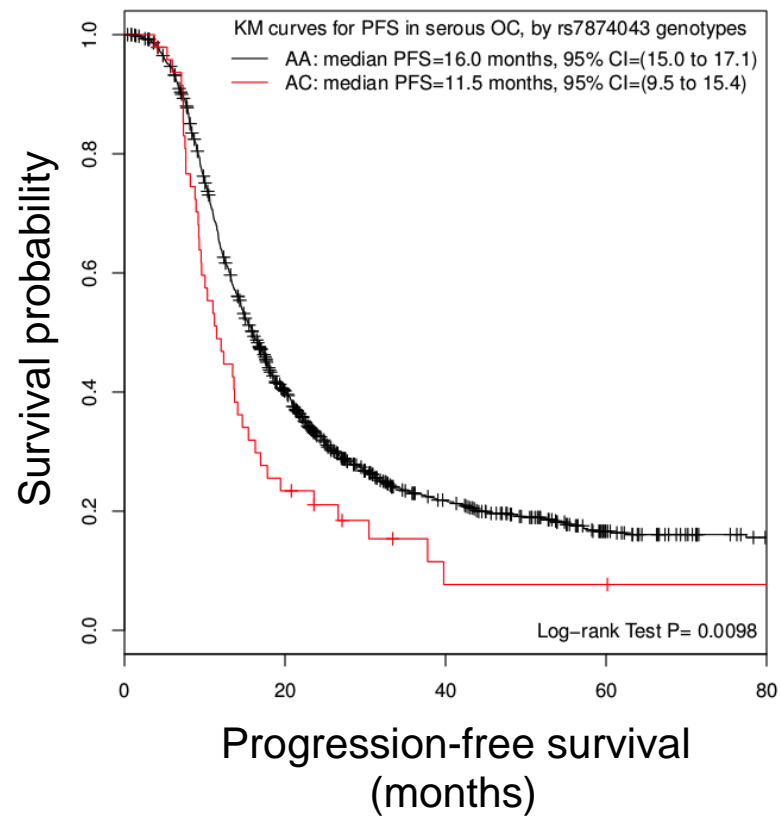

**Supplementary Figure 2. Unadjusted Kaplan-Meier (KM) curve for PFS by rs7874043 genotypes.** The KM curves compared PFS in patients with AA genotypes and with AC genotypes. Patients with CC genotypes were not observed due to the low minor allele frequency of rs7874043. The significance of differences in the KM curves was determined using a Log-rank Test. The survival curves were truncated at 80 months as only few events occurred after that.

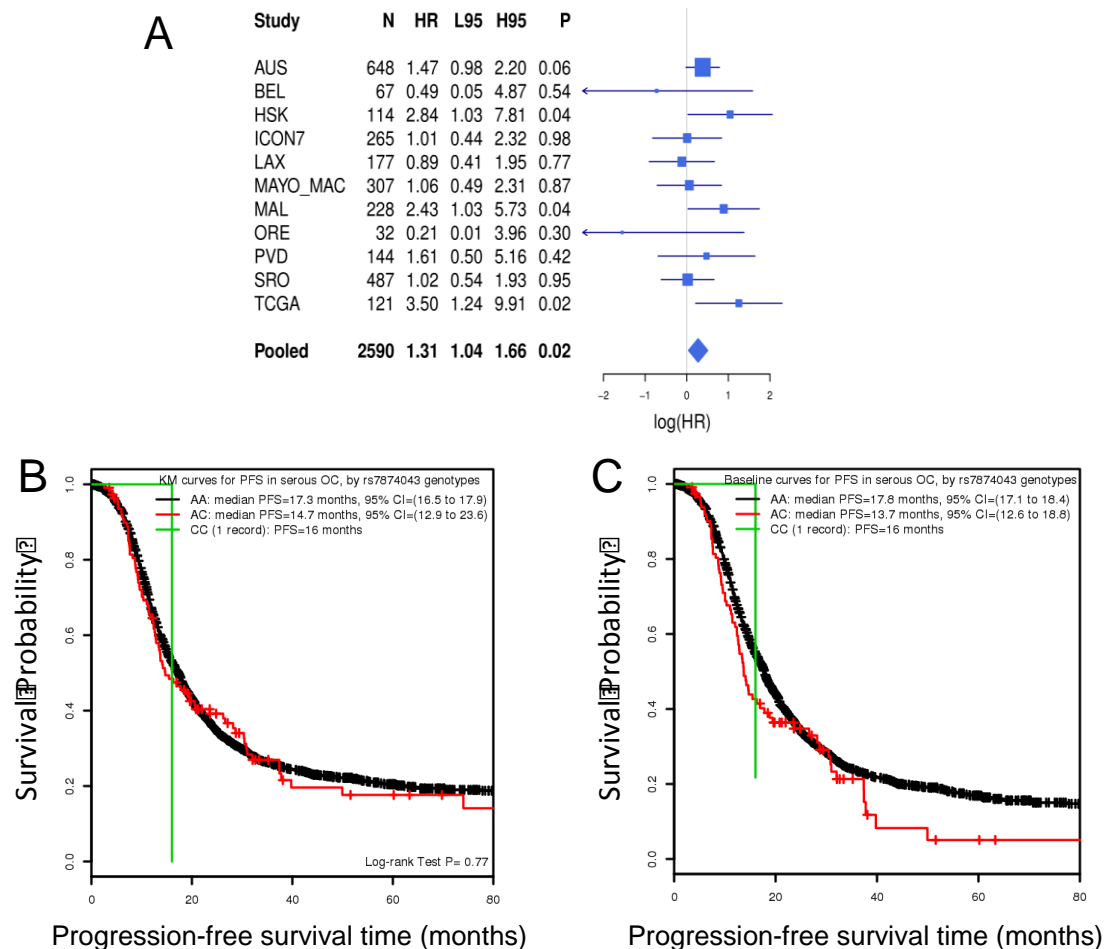

**Supplementary Figure 3. Association with PFS in serous epithelial ovarian cancer (EOC) patients without restriction on chemotherapy. (A)** Associations between the *TTC39B* SNP rs7874043 and PFS in individual studies and the overall association pooling all samples together while stratifying for studies. “HR” indicates the point estimates of hazard ratio. “L95” and “H95” represents its lower and upper 95% confidence intervals. The forest plot on the right is on the log scale. The arrow indicates that the estimate exceeds the scale of x-axis. **(B)** Unadjusted Kaplan-Meier (KM) curves and **(C)** baseline survival curves, of the three genotypes of rs7874043. The survival curves were truncated at 80 months as only few events occurred after that.

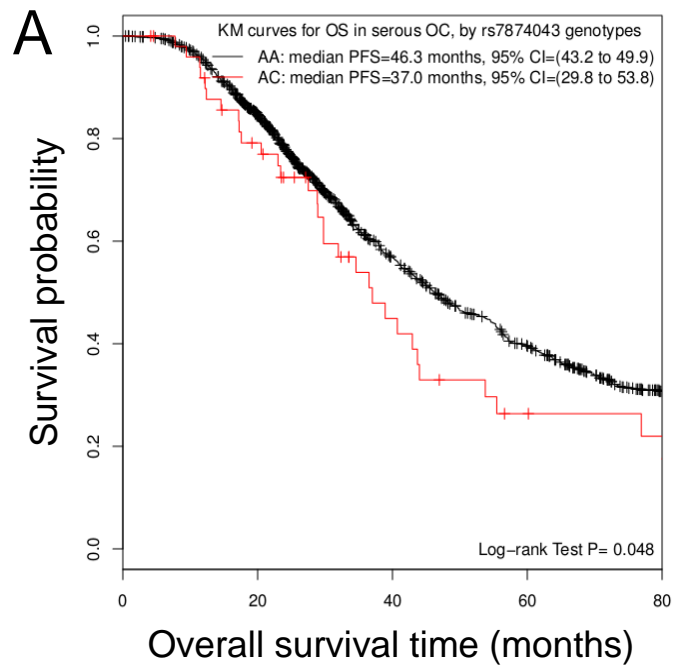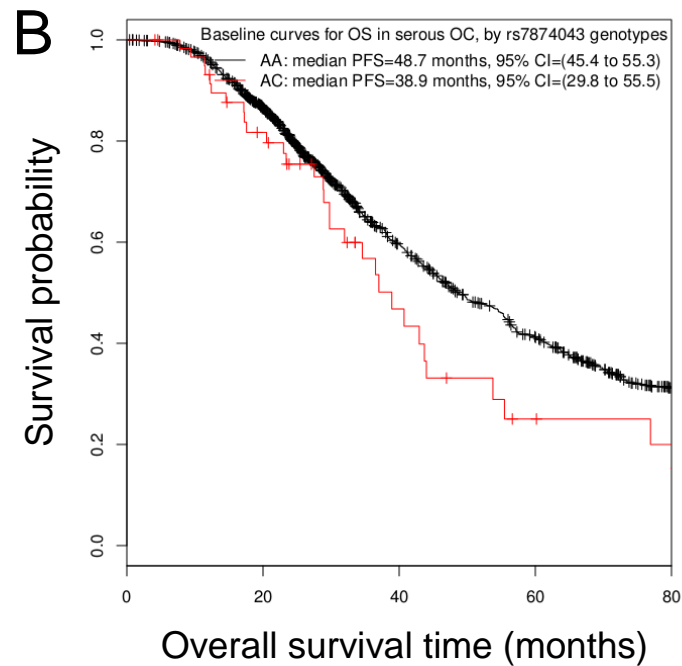

**Supplementary Figure 4. Unadjusted Kaplan-Meier curve (A) and baseline survival curves (B) for overall survival (OS) by rs7874043 genotypes.** The survival curves compared overall survival in patients with AA genotypes and with AC genotypes. Patients with CC genotypes were not observed due to the low minor allele frequency of rs7874043. The survival curves were truncated at 80 months as only few events occurred after that.

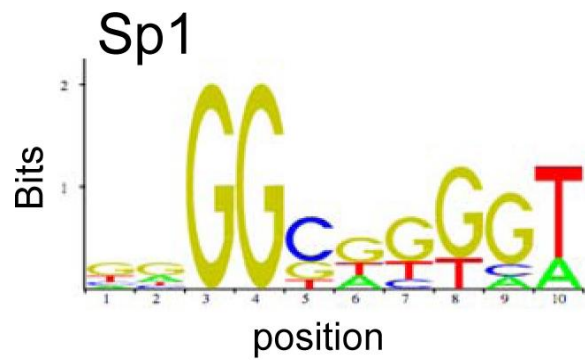

rs7874043-T GTGGCTTGTC  
 rs7874043-G GTGGCGTGTC

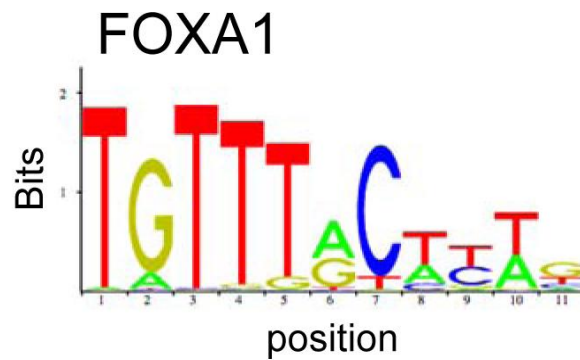

rs7874043-T GTGGCTTGTC  
 rs7874043-G GTGGCGTGTC

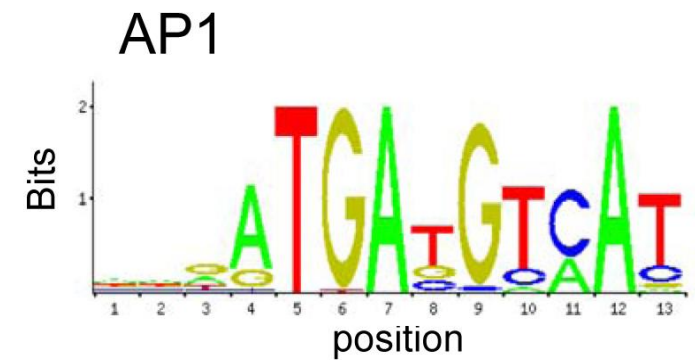

rs7874043-T GTGGCTTGTC  
 rs7874043-G GTGGCGTGTC

**Supplementary Figure 5. Transcription factor binding predictions. (A)** Position weight matrix (PWM) of Sp1, FOXA1 and AP1 from JASPAR, with homology to the PFS-associated (*g*) allele of rs7874043 colored below.

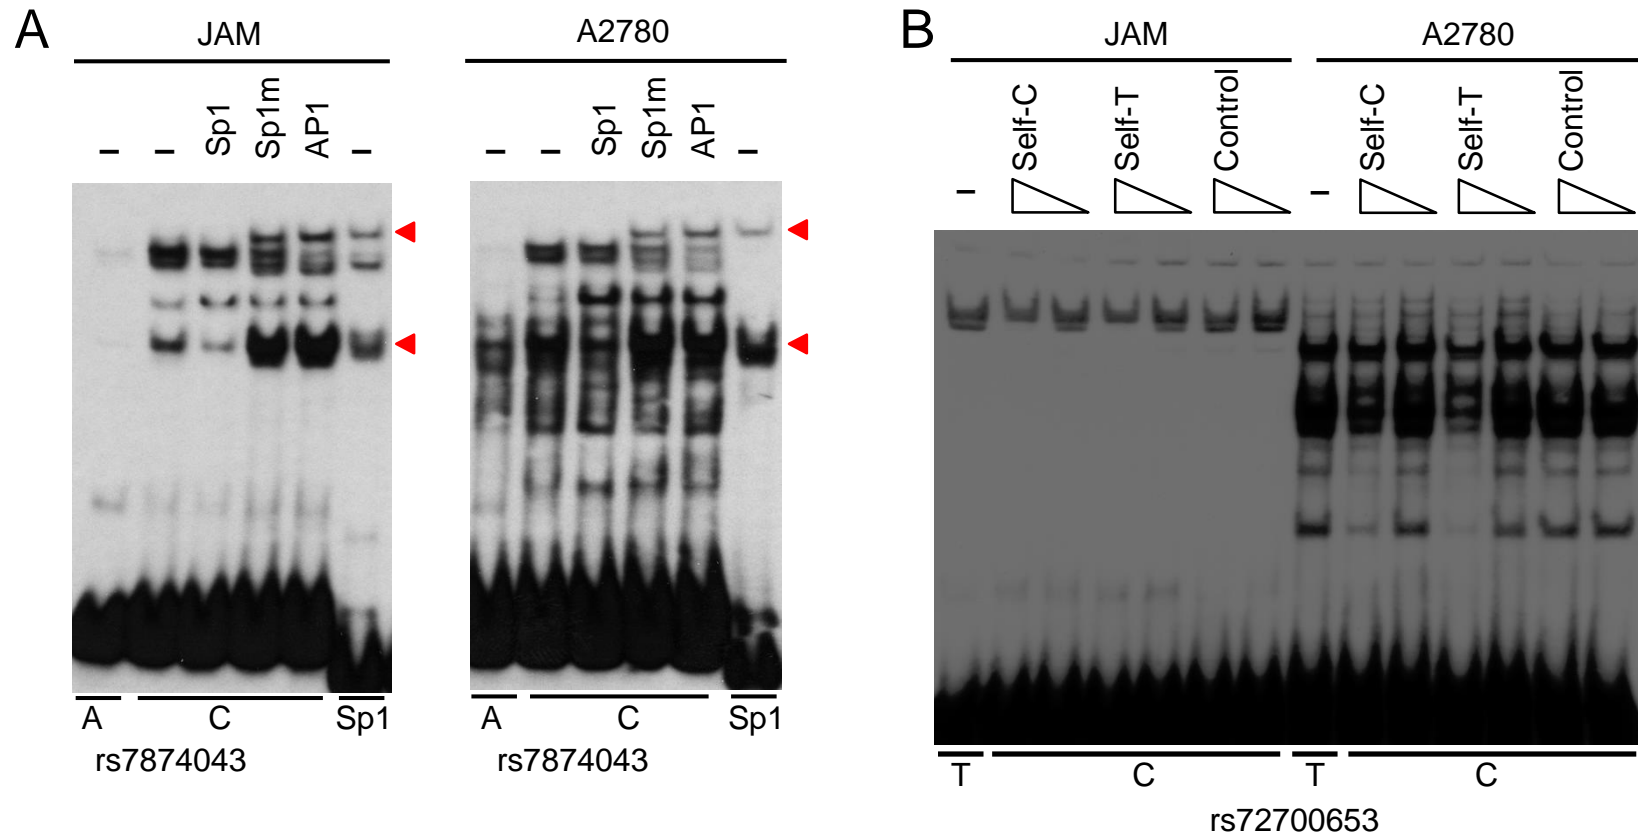

**Supplementary Figure 6. DNA-protein interactions surrounding the 9p22 PFS-associated SNPs. (A)** EMSAs using JAM or A2780 nuclear extract as per Figure 3b, except that additional controls were included. Competitor oligonucleotides are listed above each panel: (-) no competitor; Sp1, oligonucleotide with consensus Sp1 binding site; Sp1m, an identical oligonucleotide in which the Sp1 site itself was mutated; and AP1. In addition a radiolabeled Sp1 control oligonucleotide was included that yielded bands of the same mobility as those competed off by the Sp1 oligonucleotide (highlighted by the red arrow heads). The identity of the radiolabelled oligos is indicated below each panel. **(B)** EMSA for SNP rs72700653 (T=common allele, C=minor allele) in JAM and A2780 nuclear extracts. Labels above each lane indicate inclusion of competitor oligonucleotides at 30- and 10-fold molar excess, respectively. Control denotes a non-specific competitor (containing binding site for ATF, a TF not predicted to bind).

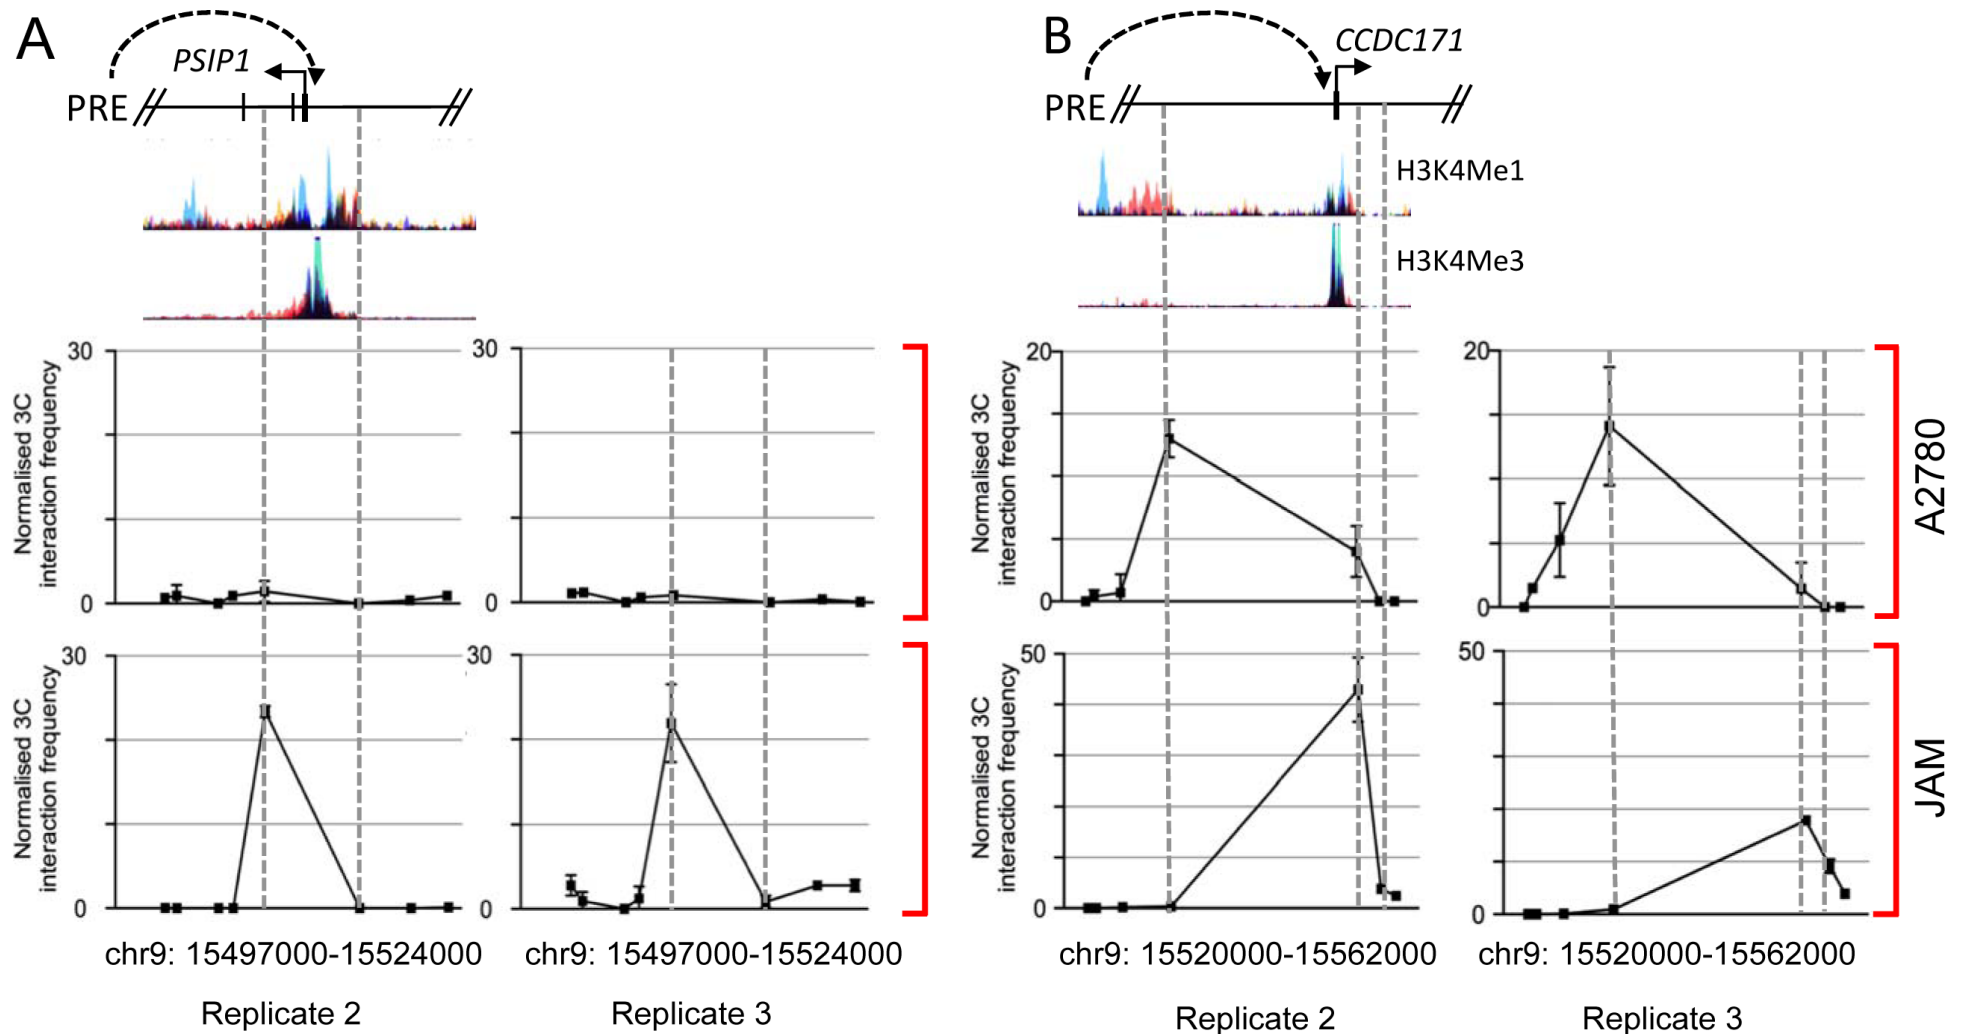

**Supplementary Figure 7. Chromatin interactions at 9p22 in ovarian cancer cell lines.** Replicate 3C interaction profiles between the putative regulatory element (PRE; containing rs72700653 and rs7874043) and **(A)** *PSIP1* or **(B)** *CCDC171* promoter regions. 3C libraries were generated with *EcoRI*, with the anchor point set at the PRE. A physical map of the region interrogated by 3C and relevant ENCODE histone modification data is shown above. Error bars denote SD.

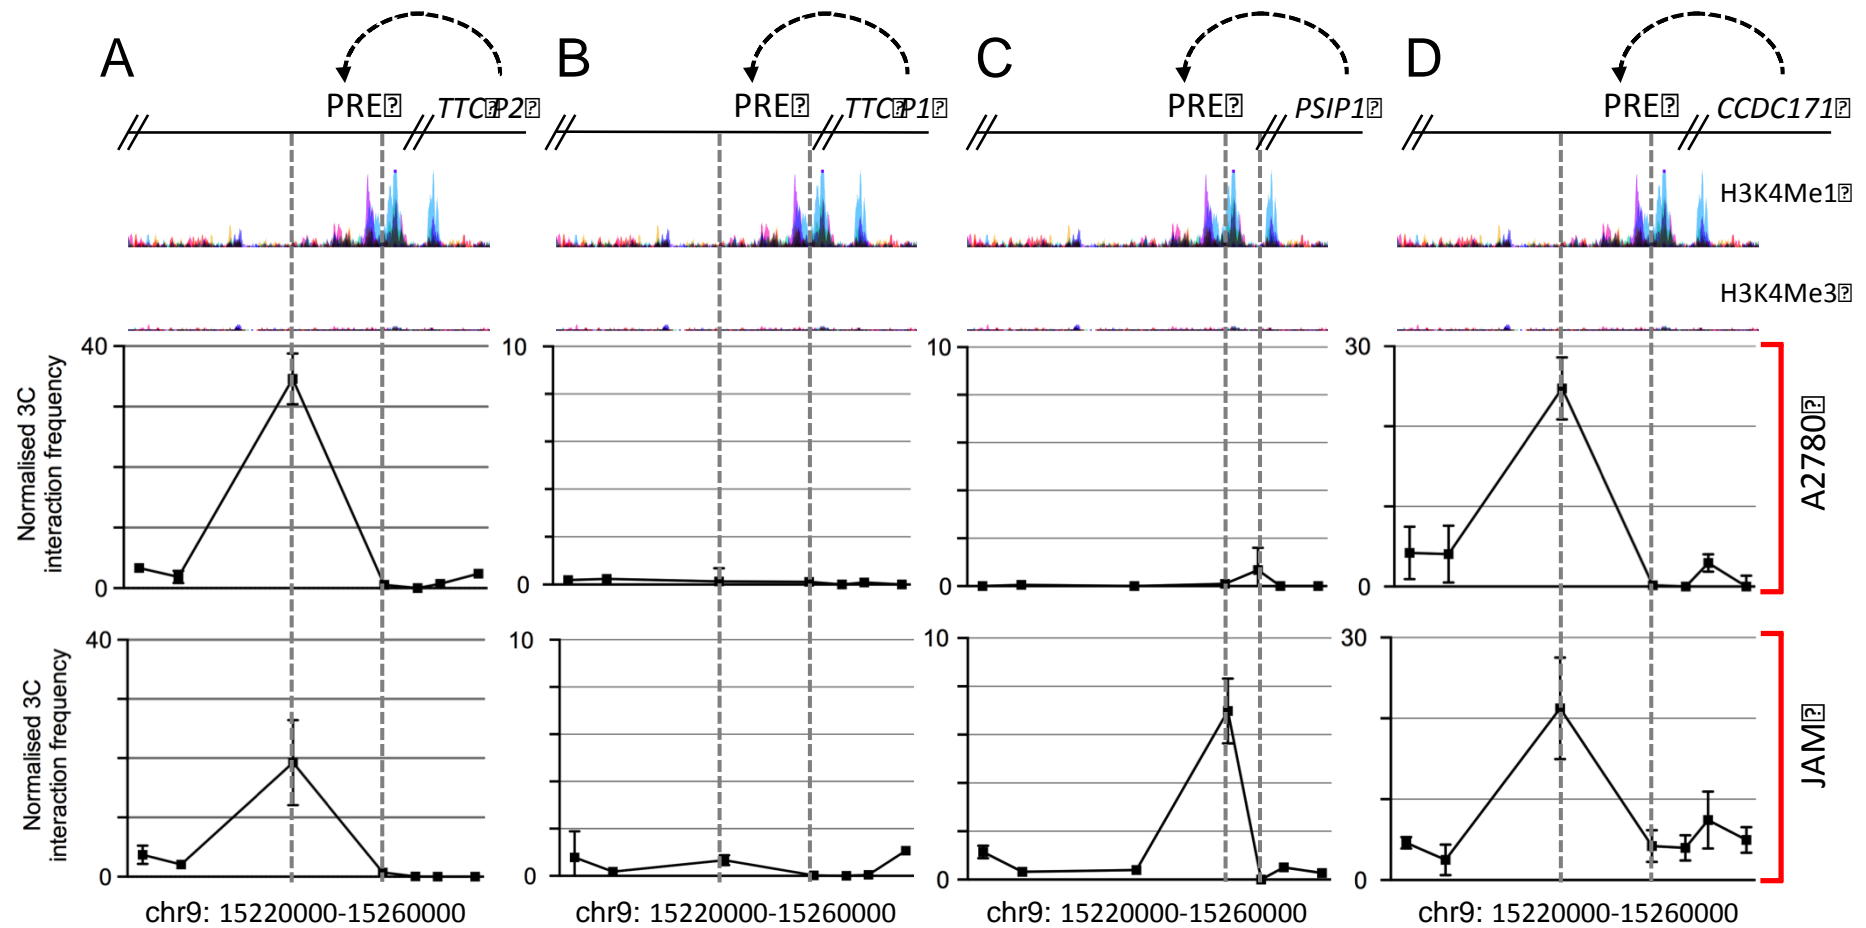

**Supplementary Figure 8. Chromatin interactions at 9p22 in ovarian cancer cell lines.** 3C interaction profiles between the putative regulatory element (PRE; containing rs72700653 and rs7874043) and **(A)** *TTC39B* alternative (P2), **(B)** *TTC39B* canonical (P1), **(C)** *PSIP1* or **(D)** *CCDC171* promoter regions. 3C libraries were generated with *Bgl*II, with the anchor point set at the relevant promoter. A physical map of the region interrogated by 3C and relevant ENCODE histone modification data is shown above. Error bars denote SD.



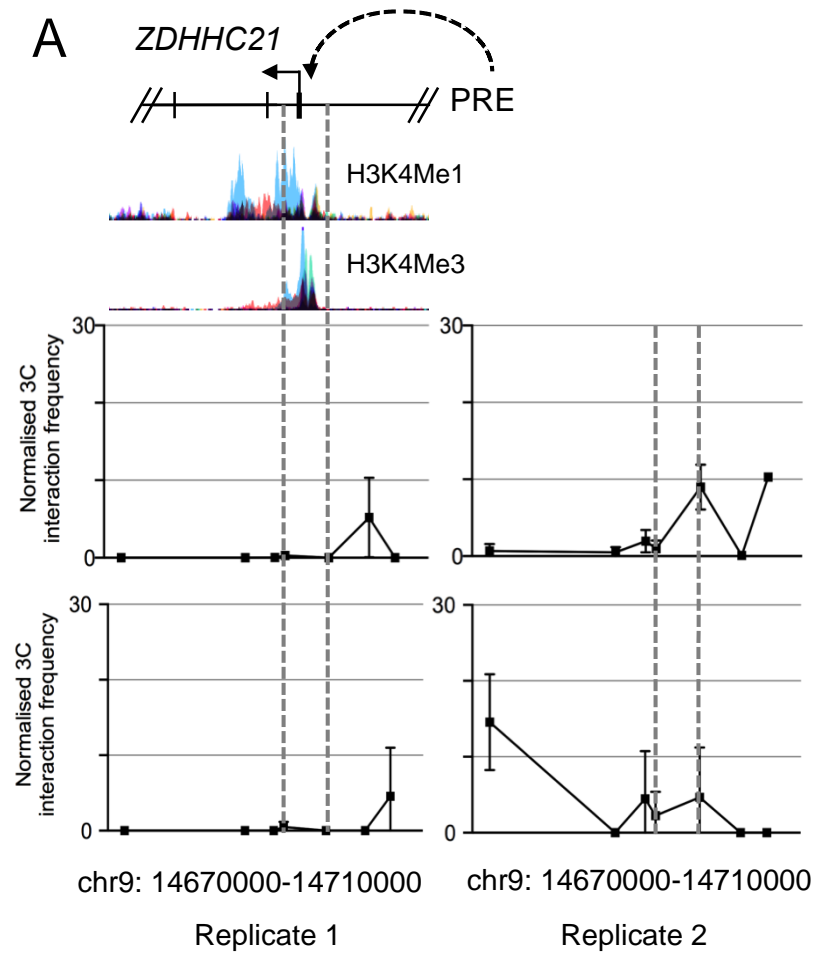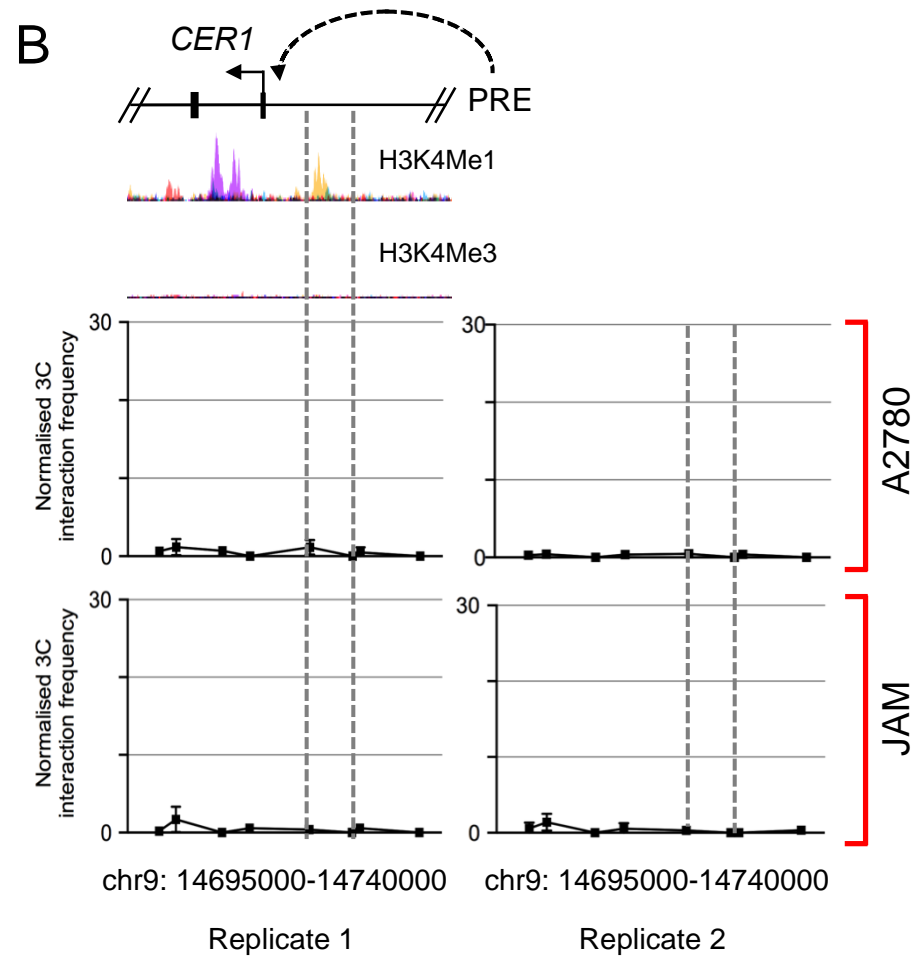

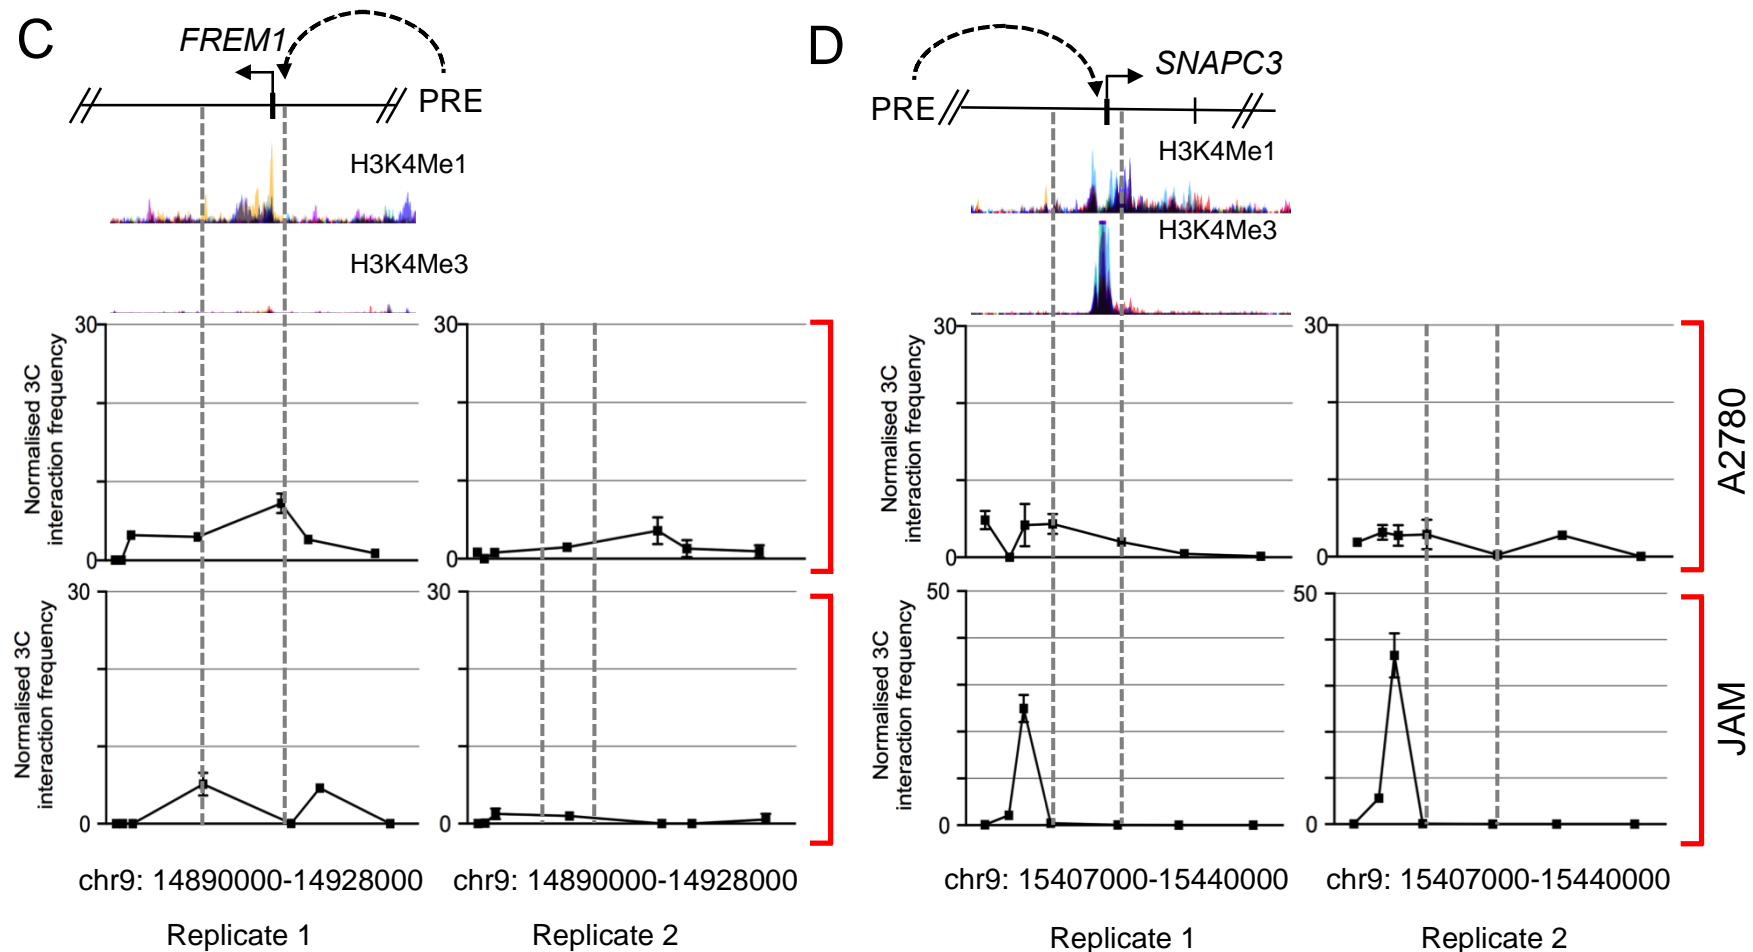

**Supplementary Figure 9. Chromatin interactions at 9p22 in ovarian cancer cell lines.** 3C interaction profiles between the putative regulatory element (PRE; containing rs72700653 and rs7874043) and (A) *ZDHHC21*, (B) *CER1*, (C) *FREM1* and (D) *SNAPC3* promoter regions. 3C was also performed with the *NFIB* promoter region but no interactions were detected. 3C libraries were generated with *EcoRI*, with the anchor point set at the PRE. A physical map of the region interrogated by 3C and relevant ENCODE histone modification data is shown above. Error bars denote SD.

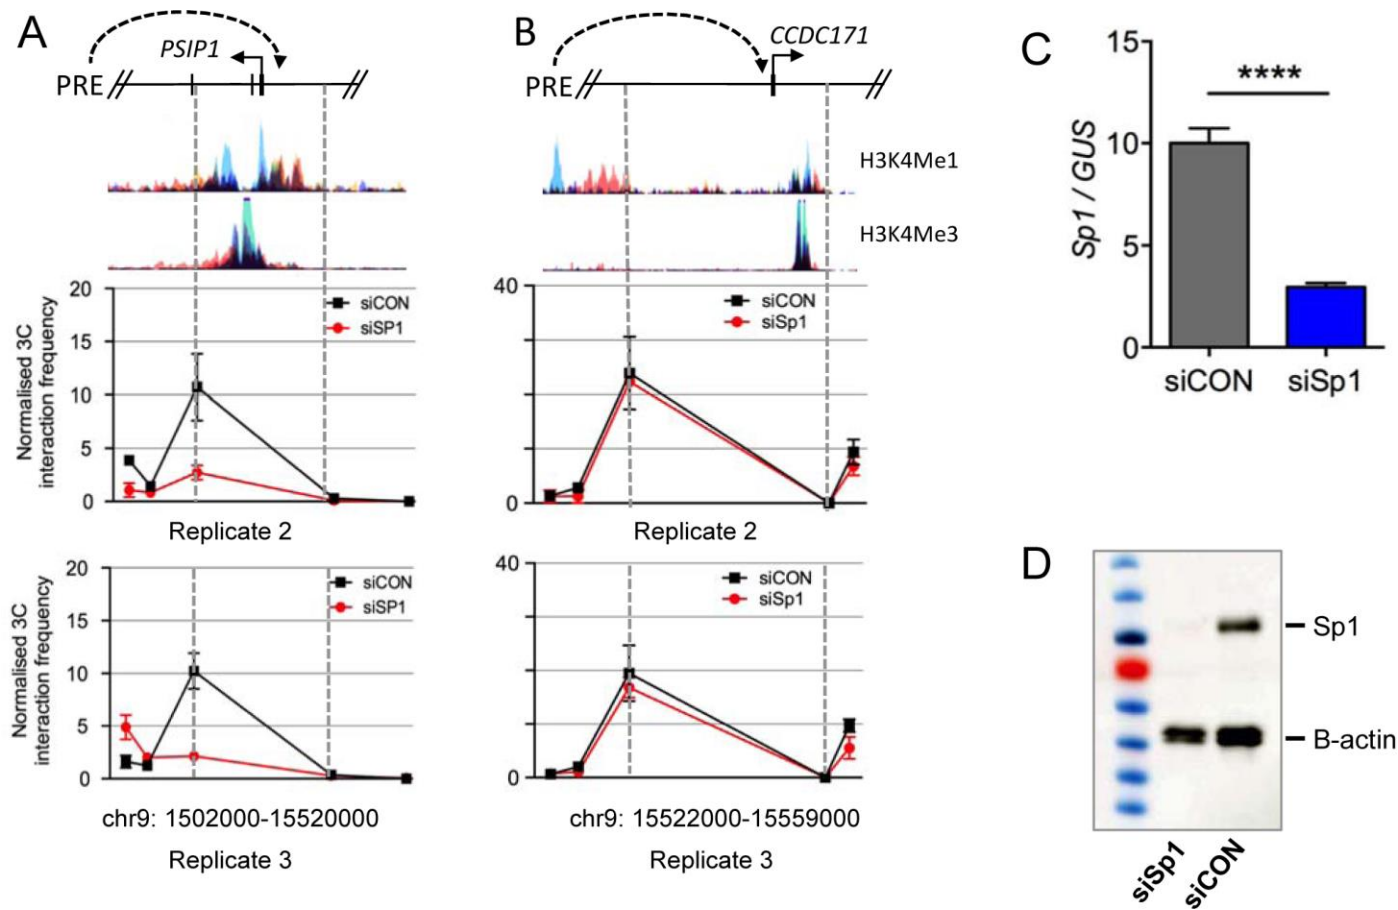

**Supplementary Figure 10. Chromatin interactions in JAM ovarian cancer cell lines following Sp1 siRNA treatment.** Replicate 3C interaction profiles between the putative regulatory element (PRE; containing rs72700653 and rs7874043) and (A) *PSIP1* or (B) *CCDC171* promoter regions. 3C libraries were generated with *EcoRI*, with the anchor point set at the PRE. A physical map of the region interrogated by 3C and relevant ENCODE histone modification data is shown above. Error bars denote SD. Sp1 RNA (C) and protein (D) levels in JAM cells following transfection of nontargeting control (siCON) or Sp1 (siSp1) RNAi smartpools. *B-glucuronidase* (GUS) or B-actin was used as loading controls, respectively. Error bars denote SEM (N=3). *P* values were determined with a two-tailed t test. \*\*\*\* $p < 0.0001$ .

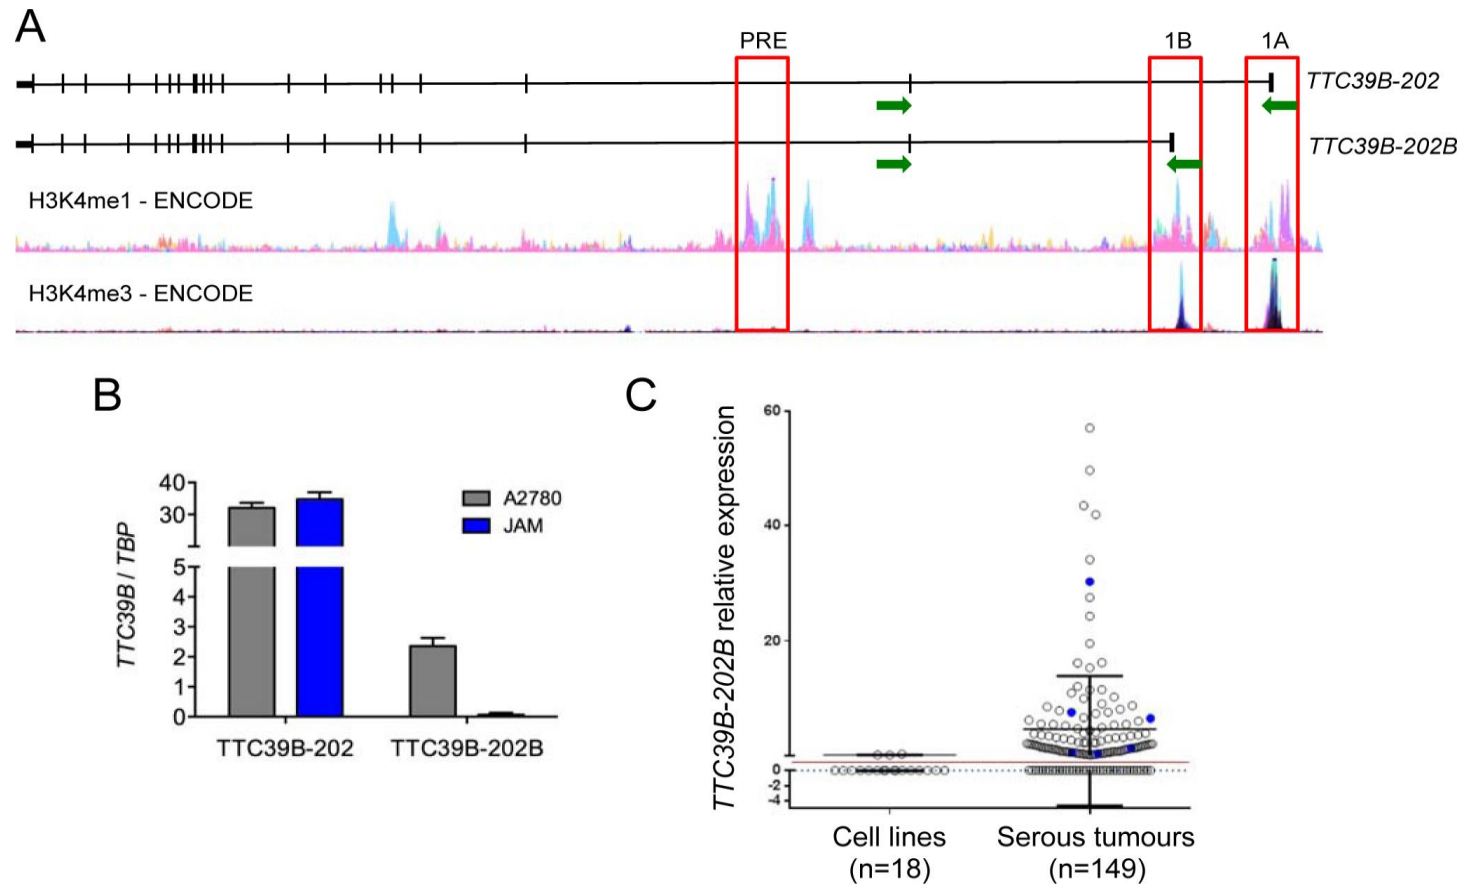

**Supplementary Figure 11. Identification and expression of a novel *TTC39B* transcript in ovarian cancer cell lines and tissues.** **(A)** Schematic of *TTC39B-202* (UCSC) and *TTC39B-202B* transcript identified through 5' and 3' RACE in this study. Colored histograms denote histone modification ChIP-seq data from ENCODE. Red boxes show the putative regulatory element (PRE) containing SNPs rs72700653 and rs7874043, canonical *TTC39B* promoter (1A) and novel *TTC39B* promoter (1B). Green arrows show primers used for RACE and qRT-PCR **(B)** qRT-PCR assay measuring *TTC39B* mRNA levels relative to *TATA-binding protein* (TBP) mRNA levels in A2780 and JAM cell lines. Graphs represent three independent experiments. Error bars denote SEM. **(C)** Relative expression of *TTC39B-202B* transcript in ovarian cancer cell lines (n=18) and serous ovarian epithelial tumors (n=149) was calculated by the  $\Delta\Delta C_t$  method. Samples were calibrated using the median  $\Delta C_t$  for the cohort. The red line denotes the level below which samples were non-quantitative or undetected. Blue circles indicate tumours heterozygous for rs7874043.

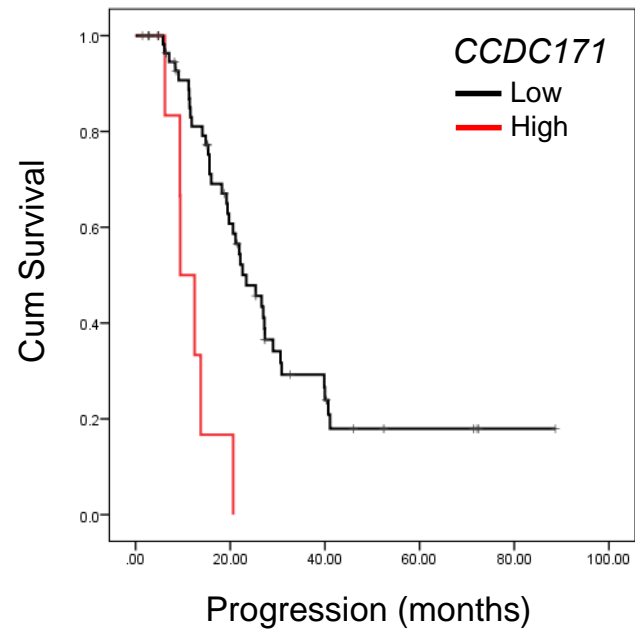

**Supplementary Figure 12. Kaplan-Meier curves of association between expression of *CCDC171* with overall survival in epithelial ovarian cancer.** Cum = cumulative. Expression of *CCDC171* for the upper decile vs remaining patients (log rank  $P = 0.001$ ) with progression-free survival in 68 patients with serous epithelial ovarian cancer (selected for nil residual disease) in TCGA.

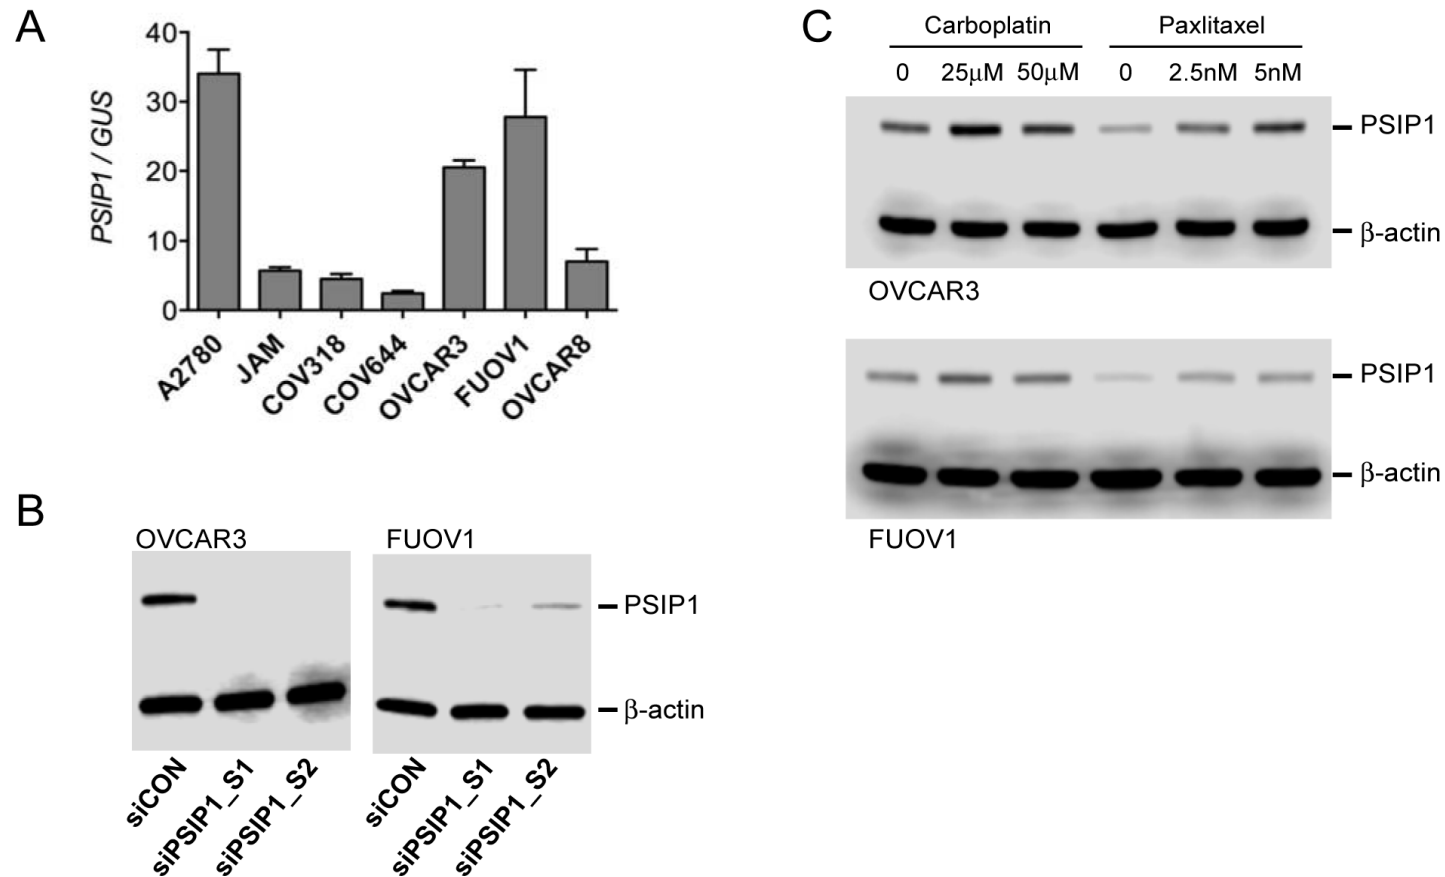

**Supplementary Figure 13. PSIP1 levels in ovarian cancer cell lines. (A)** *PSIP1* RNA levels in ovarian cancer cells. *B-galactosidase* (GUS) was used as a loading control. **(B)** *PSIP1* protein levels in ovarian cancer cells following transfection of nontargeting control (siCON) or two independent *PSIP1* (siPSIP1) siRNAs.  $\beta$ -actin was used as a loading control. **(C)** FUOV1 and OVCAR3 cells were seeded into 6-well plates at  $7.5 \times 10^5$  cells per well. Cells were treated 16 h later with 25  $\mu$ M and 50  $\mu$ M of carboplatin (PBS as vehicle control), or 2.5 nM and 5 nM of paclitaxel (DMSO as vehicle control), incubated for a further 48 h, then protein extracted for Western blot analysis.  $\beta$ -actin was used as loading control.

**Supplementary Table 1.** Associations of 190 SNPs selected from Phase1 GWAS for replication, and 10 SNP in *YAP1*.

| SNP            | Chr | BP_b37    | Gene     | P <sub>1</sub> <sup>a</sup> | P <sub>2</sub> <sup>b</sup> | P <sub>c</sub> <sup>c</sup> | SNP               | Chr      | BP_b37          | Gene          | P <sub>1</sub> <sup>a</sup> | P <sub>2</sub> <sup>b</sup> | P <sub>c</sub> <sup>c</sup> |
|----------------|-----|-----------|----------|-----------------------------|-----------------------------|-----------------------------|-------------------|----------|-----------------|---------------|-----------------------------|-----------------------------|-----------------------------|
| chr1:2921571   | 1   | 2921571   | --       | 2.8E-05                     | 0.12                        | 0.031                       | rs2390487         | 2        | 167660965       | --            | 7.7E-03                     | 0.7                         | 0.25                        |
| rs11209363     | 1   | 41485077  | SLFNL1   | 2.3E-04                     | 0.0017                      | 0.066                       | rs17400325        | 2        | 178565913       | PDE11A        | 6.3E-06                     | 0.36                        | 0.067                       |
| rs2236129      | 1   | 41617914  | SCMH1    | 6.7E-04                     | 0.018                       | 0.17                        | rs73034264        | 2        | 178669674       | PDE11A        | 5.6E-06                     | 0.35                        | 0.28                        |
| chr1:55051230  | 1   | 55051230  | ACOT11   | 1.4E-06                     | 0.67                        | 0.01                        | rs73034271        | 2        | 178671155       | PDE11A        | 7.9E-06                     | 0.24                        | 0.6                         |
| rs207145       | 1   | 55808143  | --       | 7.4E-05                     | 0.58                        | 0.29                        | rs73034292        | 2        | 178679243       | PDE11A        | 3.3E-05                     | 0.33                        | 0.42                        |
| chr1:76501317  | 1   | 76501317  | --       | 4.7E-03                     | 0.13                        | 0.57                        | rs3821009         | 2        | 178682471       | PDE11A        | 5.6E-06                     | 0.58                        | 0.022                       |
| rs12073224     | 1   | 92200963  | TGFBR3   | 6.3E-06                     | 0.29                        | 0.029                       | rs1025598         | 2        | 178921642       | PDE11A        | 1.5E-05                     | 0.29                        | 0.0089                      |
| rs12035421     | 1   | 96361709  | --       | 2.7E-04                     | 0.83                        | 0.69                        | chr2:179013814    | 2        | 179013814       | --            | 5.0E-05                     | 0.13                        | 0.66                        |
| rs61789271     | 1   | 96474723  | --       | 3.8E-05                     | 0.44                        | 0.69                        | rs72911330        | 2        | 191002884       | C2orf88       | 2.5E-02                     | 0.3                         | 0.041                       |
| rs11166552     | 1   | 101661978 | --       | 7.1E-05                     | 0.1                         | 0.38                        | rs10221670        | 2        | 209040591       | C2orf80       | 1.3E-01                     | 0.1                         | 0.074                       |
| rs790056       | 1   | 160969585 | F11R     | 7.5E-05                     | 0.97                        | 0.22                        | rs28407435        | 3        | 13147337        | --            | 1.5E-02                     | 0.82                        | 0.13                        |
| chr1:179923814 | 1   | 179923814 | --       | 3.0E-06                     | 0.33                        | 0.006                       | rs28879123        | 3        | 16266489        | GALNTL2       | 1.4E-05                     | 0.62                        | 0.55                        |
| rs16855014     | 1   | 179925538 | CEP350   | 2.2E-05                     | 0.42                        | 0.0075                      | rs35804331        | 3        | 21770573        | ZNF385D       | 2.9E-05                     | 0.56                        | 0.14                        |
| chr1:219133120 | 1   | 219133120 | --       | 1.5E-07                     | 0.41                        | 0.085                       | rs62250946        | 3        | 43543023        | ANO10         | 1.8E-05                     | 0.54                        | 0.14                        |
| chr1:231636516 | 1   | 231636516 | --       | 6.8E-06                     | 0.8                         | 0.048                       | rs35225847        | 3        | 44299339        | C3orf77       | 1.9E-04                     | 0.75                        | 0.16                        |
| chr1:236289189 | 1   | 236289189 | --       | 2.4E-06                     | 0.13                        | 0.00074                     | rs1482622         | 3        | 83004712        | --            | 2.1E-05                     | 0.55                        | 0.0086                      |
| rs12035655     | 1   | 236351833 | GPR137B  | 9.9E-07                     | 0.77                        | 0.21                        | rs62258905        | 3        | 104375385       | --            | 3.8E-05                     | 0.35                        | 0.25                        |
| rs811309       | 2   | 7869927   | --       | 4.1E-06                     | 0.16                        | 0.66                        | rs13100275        | 3        | 162083007       | --            | 3.3E-05                     | 0.64                        | 0.019                       |
| chr2:12141045  | 2   | 12141045  | --       | 1.6E-06                     | 0.8                         | 0.12                        | rs34264209        | 3        | 162093889       | --            | 3.6E-06                     | 0.87                        | 0.035                       |
| rs7604694      | 2   | 13681063  | --       | 1.5E-03                     | 0.4                         | 0.0039                      | chr3:169735222    | 3        | 169735222       | --            | 1.7E-05                     | 0.37                        | 0.47                        |
| rs11096718     | 2   | 17281115  | --       | 8.7E-05                     | 0.31                        | 0.19                        | chr4:28644668     | 4        | 28644668        | --            | 1.7E-05                     | 0.43                        | 0.061                       |
| rs62123793     | 2   | 17310155  | --       | 6.4E-05                     | 0.81                        | 0.029                       | rs17830463        | 4        | 75218488        | --            | 4.5E-02                     | 0.0043                      | 0.0037                      |
| rs62139377     | 2   | 41976649  | --       | 3.5E-04                     | 0.72                        | 0.12                        | chr4:83590711     | 4        | 83590711        | SCD5          | 2.7E-06                     | 0.23                        | 0.52                        |
| rs62134193     | 2   | 45054836  | --       | 1.1E-05                     | 0.63                        | 0.032                       | rs72883270        | 4        | 94926423        | --            | 3.4E-02                     | 0.89                        | 0.44                        |
| chr2:81741335  | 2   | 81741335  | --       | 3.9E-04                     | 0.27                        | 0.61                        | rs3104107         | 4        | 141449275       | ELMOD2        | 2.2E-05                     | 0.18                        | 0.76                        |
| chr2:104825558 | 2   | 104825558 | --       | 1.9E-02                     | 0.17                        | 0.27                        | chr4:153135451    | 4        | 153135451       | --            | 2.3E-07                     | 0.26                        | 0.056                       |
| rs10171182     | 2   | 144417583 | ARHGAP15 | 2.6E-02                     | 0.44                        | 0.025                       | rs11940756        | 4        | 184296922       | --            | 5.5E-06                     | 0.43                        | 0.047                       |
| rs72859654     | 2   | 144448659 | ARHGAP15 | 2.9E-02                     | 0.13                        | 0.0017                      | chr5:10131285     | 5        | 10131285        | --            | 2.7E-07                     | 0.2                         | 0.098                       |
| rs10497137     | 2   | 154691177 | --       | 1.4E-05                     | 0.27                        | 0.019                       | rs9314069         | 5        | 164877178       | --            | 6.7E-03                     | 0.92                        | 0.32                        |
| rs62174116     | 2   | 154717220 | --       | 2.4E-05                     | 0.82                        | 0.17                        | rs12522758        | 5        | 164877481       | --            | 1.5E-03                     | 0.65                        | 0.16                        |
| rs4339375      | 5   | 165652271 | --       | 1.0E-07                     | 0.6                         | 0.53                        | rs36097937        | 9        | 14132910        | NFIB          | 7.1E-05                     | 0.93                        | 0.19                        |
| rs1353920      | 5   | 165655853 | --       | 3.1E-08                     | 0.024                       | 0.63                        | <b>rs72700653</b> | <b>9</b> | <b>15249050</b> | <b>TTC39B</b> | <b>7.8E-04</b>              | <b>0.00019</b>              | <b>3.5E-07</b>              |

|                |    |           |         |         |       |        |                     |          |                 |               |                |                 |                |
|----------------|----|-----------|---------|---------|-------|--------|---------------------|----------|-----------------|---------------|----------------|-----------------|----------------|
| chr5:168516390 | 5  | 168516390 | SLIT3   | 1.2E-05 | 0.38  | 0.81   | <b>rs7874043</b>    | <b>9</b> | <b>15249431</b> | <b>TTC39B</b> | <b>7.9E-04</b> | <b>0.000069</b> | <b>3.6E-07</b> |
| rs7759455      | 6  | 2032887   | GMDS    | 6.3E-03 | 0.24  | 0.051  | rs55791531          | 9        | 15399766        | --            | 3.9E-01        | 0.55            | 0.77           |
| rs1539422      | 6  | 15950027  | --      | 2.8E-05 | 0.47  | 0.036  | rs10963675          | 9        | 18619044        | ADAMTSL       | 6.3E-05        | 0.11            | 0.00025        |
| chr6:22950908  | 6  | 22950908  | --      | 3.1E-05 | 0.81  | 0.39   | rs10963676          | 9        | 18622043        | ADAMTSL       | 4.4E-05        | 0.66            | 0.11           |
| chr6:22968035  | 6  | 22968035  | --      | 1.1E-04 | 0.43  | 0.51   | rs7865992           | 9        | 27189732        | TEK           | 4.4E-03        | 0.76            | 0.39           |
| rs62389569     | 6  | 22979636  | --      | 5.8E-04 | 0.84  | 0.072  | rs11144555          | 9        | 78264091        | MIR548H3      | 1.2E-05        | 0.42            | 0.17           |
| rs7754089      | 6  | 23115046  | --      | 1.3E-05 | 0.21  | 0.26   | rs1331924           | 9        | 107547622       | ABCA1         | 4.3E-03        | 0.81            | 0.11           |
| rs62399101     | 6  | 23180995  | --      | 1.1E-04 | 0.41  | 0.51   | rs10759126          | 9        | 108432696       | --            | 2.4E-06        | 0.21            | 0.035          |
| chr6:23193131  | 6  | 23193131  | --      | 3.1E-03 | 0.57  | 0.8    | rs7861233           | 9        | 117755116       | --            | 2.2E-05        | 0.41            | 0.17           |
| rs4712745      | 6  | 23193810  | --      | 1.9E-03 | 0.84  | 0.13   | rs7089727           | 10       | 1722488         | ADARB2        | 2.1E-03        | 0.38            | 0.51           |
| rs12195168     | 6  | 23197905  | --      | 1.9E-03 | 0.55  | 0.22   | rs73579126          | 10       | 9431550         | --            | 1.6E-05        | 0.097           | 0.00064        |
| rs62399106     | 6  | 23199025  | --      | 1.6E-03 | 0.53  | 0.6    | rs10827631          | 10       | 36648566        | --            | 5.6E-04        | 0.38            | 0.74           |
| rs61559613     | 6  | 74524178  | CD109   | 1.8E-03 | 0.37  | 0.041  | rs4148398           | 10       | 101592622       | ABCC2         | 3.4E-01        | 0.65            | 0.89           |
| chr6:74641387  | 6  | 74641387  | --      | 3.4E-03 | 0.36  | 0.15   | chr10:1244113<br>92 | 10       | 124411392       | --            | 1.6E-02        | 0.64            | 0.2            |
| chr6:77488849  | 6  | 77488849  | --      | 1.2E-05 | 0.16  | 0.4    | rs6483541           | 11       | 18866999        | --            | 1.0E-04        | 0.68            | 0.0088         |
| chr6:77815380  | 6  | 77815380  | --      | 1.8E-05 | 0.37  | 0.71   | rs584726            | 11       | 30095422        | --            | 5.3E-06        | 0.34            | 0.4            |
| rs6570115      | 6  | 137253162 | --      | 5.1E-05 | 0.47  | 0.11   | rs4755777           | 11       | 44124318        | EXT2          | 1.9E-02        | 0.27            | 0.0004         |
| rs9371821      | 6  | 154981953 | --      | 6.5E-05 | 0.88  | 0.1    | rs1820453           | 11       | 101980335       | YAP1          | 7.2E-01        | 0.77            | 0.72           |
| rs6462134      | 7  | 29423523  | CHN2    | 1.1E-03 | 0.52  | 0.49   | rs10895257          | 11       | 101986644       | YAP1          | 5.2E-01        | 0.75            | 0.65           |
| rs1362360      | 7  | 29506756  | CHN2    | 1.1E-01 | 0.25  | 0.12   | rs12420608          | 11       | 101992349       | YAP1          | 1.7E-04        | 0.37            | 0.47           |
| chr8:3633487   | 8  | 3633487   | CSMD1   | 2.1E-06 | 0.093 | 0.39   | rs11225138          | 11       | 101993898       | YAP1          | 7.2E-01        | 0.23            | 0.58           |
| rs2732987      | 8  | 5542087   | --      | 2.2E-04 | 0.96  | 0.078  | chr11:1015395<br>68 | 11       | 102034358       | YAP1          | 5.1E-05        | 0.78            | 0.17           |
| rs4875190      | 8  | 5549469   | --      | 3.4E-05 | 0.9   | 0.04   | rs10895269          | 11       | 102039296       | YAP1          | 9.8E-01        | 0.088           | 0.071          |
| rs72649453     | 8  | 59731018  | TOX     | 5.6E-04 | 0.051 | 0.0058 | rs1942683           | 11       | 102044647       | YAP1          | 8.6E-01        | 0.21            | 0.069          |
| chr8:68727023  | 8  | 68727023  | --      | 1.4E-02 | 0.72  | 0.29   | rs11602707          | 11       | 102045643       | YAP1          | 9.2E-01        | 0.82            | 0.35           |
| rs28512278     | 8  | 104288012 | --      | 4.3E-02 | 0.53  | 0.13   | rs17097475          | 11       | 102053823       | YAP1          | 7.9E-01        | 0.44            | 0.94           |
| rs1434520      | 8  | 108999623 | RSPO2   | 3.1E-05 | 0.19  | 0.14   | rs17689778          | 11       | 102063437       | YAP1          | 7.1E-01        | 0.25            | 0.45           |
| rs17789043     | 8  | 120342332 | --      | 6.7E-06 | 0.24  | 0.31   | rs11824640          | 11       | 134348650       | --            | 1.7E-05        | 0.41            | 0.99           |
| rs11780467     | 8  | 138199228 | --      | 6.3E-05 | 0.13  | 0.9    | rs73036394          | 11       | 134398777       | --            | 6.5E-05        | 0.77            | 0.15           |
| rs10967320     | 9  | 2644002   | VLDLR   | 1.7E-09 | 0.13  | 0.52   | rs10492110          | 12       | 9493492         | --            | 9.3E-04        | 0.7             | 0.038          |
| rs1929429      | 9  | 12480405  | --      | 3.8E-06 | 0.55  | 0.52   | rs61913576          | 12       | 9632555         | --            | 8.1E-03        | 0.36            | 0.13           |
| chr12:44529683 | 12 | 44529683  | TMEM117 | 1.8E-05 | 0.84  | 0.15   | chr16:8879839<br>8  | 16       | 88798398        | FAM38A        | 1.4E-04        | 0.56            | 0.082          |
| rs11170327     | 12 | 53307026  | --      | 6.5E-06 | 0.2   | 0.36   | chr16:8881689<br>4  | 16       | 88816894        | FAM38A        | 1.2E-03        | 0.27            | 0.055          |
| rs1861932      | 12 | 68886533  | --      | 1.4E-02 | 0.37  | 0.032  | rs11076712          | 16       | 88820353        | FAM38A        | 1.1E-02        | 0.21            | 0.14           |



|                |    |           |        |         |       |        |                |    |          |          |         |       |         |
|----------------|----|-----------|--------|---------|-------|--------|----------------|----|----------|----------|---------|-------|---------|
| rs3860254      | 12 | 80804476  | --     | 3.8E-05 | 0.14  | 0.0016 | chr17:752428   | 17 | 752428   | NXN      | 1.5E-05 | 0.26  | 0.39    |
| rs17193501     | 12 | 91172990  | --     | 8.4E-06 | 0.88  | 0.013  | rs8066936      | 17 | 754600   | NXN      | 1.9E-06 | 0.91  | 0.092   |
| rs12308739     | 12 | 91187331  | --     | 2.6E-05 | 0.47  | 0.0036 | rs56803883     | 17 | 755097   | NXN      | 1.6E-06 | 0.84  | 0.12    |
| rs11105855     | 12 | 91274561  | --     | 3.0E-06 | 0.35  | 0.0043 | rs12449568     | 17 | 54430155 | ANKFN1   | 3.4E-04 | 0.57  | 0.017   |
| rs17021407     | 12 | 94013808  | --     | 1.3E-07 | 0.64  | 0.67   | rs7212686      | 17 | 66923711 | ABCA8    | 5.8E-03 | 0.45  | 0.1     |
| rs257963       | 12 | 97710988  | --     | 6.8E-04 | 0.27  | 0.9    | rs6502005      | 17 | 67103511 | ABCA6    | 6.0E-01 | 0.56  | 0.74    |
| chr12:97717747 | 12 | 97717747  | --     | 2.3E-04 | 0.8   | 0.016  | rs536009       | 17 | 67273882 | ABCA5    | 1.2E-03 | 0.012 | 0.00031 |
| rs71460383     | 12 | 97720887  | --     | 1.7E-03 | 0.35  | 0.029  | chr17:75162047 | 17 | 75162047 | SEC14L1  | 1.5E-05 | 0.57  | 0.12    |
| rs1878022      | 12 | 108699032 | CMKLR1 | 4.3E-01 | 0.46  | 0.96   | rs7214455      | 17 | 75599604 | --       | 6.1E-05 | 0.91  | 0.088   |
| rs17075983     | 13 | 31991953  | --     | 4.2E-05 | 0.64  | 0.19   | rs55682777     | 18 | 45511144 | --       | 7.2E-06 | 0.7   | 0.29    |
| rs2314972      | 13 | 31992393  | --     | 4.6E-03 | 0.22  | 0.057  | rs1011420      | 18 | 46282982 | KIAA0427 | 5.4E-03 | 0.89  | 0.13    |
| rs12584266     | 13 | 31994485  | --     | 2.0E-03 | 0.64  | 0.053  | rs6566916      | 18 | 55674257 | --       | 4.5E-05 | 0.21  | 0.017   |
| rs716276       | 13 | 32012208  | --     | 3.9E-04 | 0.52  | 0.32   | rs1942528      | 18 | 55676499 | --       | 1.7E-06 | 0.4   | 0.3     |
| rs7989641      | 13 | 64126078  | --     | 1.7E-06 | 0.029 | 0.0014 | rs72939535     | 18 | 63620142 | --       | 4.6E-05 | 0.095 | 0.0032  |
| rs9600222      | 13 | 74652873  | KLF12  | 7.3E-05 | 0.69  | 0.12   | rs4510132      | 18 | 64021299 | --       | 6.0E-05 | 0.21  | 0.0044  |
| rs9566037      | 13 | 85728432  | --     | 3.5E-05 | 0.034 | 0.55   | rs12458066     | 18 | 64252555 | CDH19    | 9.4E-05 | 0.82  | 0.1     |
| rs9602695      | 13 | 85807556  | --     | 2.5E-05 | 0.3   | 0.41   | rs73542498     | 19 | 30100002 | POP4     | 3.5E-06 | 0.86  | 0.78    |
| rs7335794      | 13 | 85838725  | --     | 4.8E-05 | 0.44  | 0.42   | rs73057016     | 19 | 53826943 | --       | 1.3E-03 | 0.59  | 0.0073  |
| rs12431174     | 13 | 85840960  | --     | 3.0E-06 | 0.8   | 0.004  | chr20:40563880 | 20 | 40563880 | --       | 3.0E-05 | 0.069 | 0.00077 |
| rs12879346     | 14 | 23652708  | SLC7A8 | 7.4E-05 | 0.34  | 0.76   | rs55699935     | 20 | 55361541 | --       | 2.0E-02 | 0.24  | 0.98    |
| rs880979       | 14 | 31056351  | G2E3   | 9.6E-06 | 0.58  | 0.17   | rs59635584     | 20 | 55364044 | --       | 1.7E-02 | 0.21  | 0.75    |
| rs12589770     | 14 | 41130279  | --     | 1.6E-02 | 0.72  | 0.44   | rs1048672      | 21 | 35210184 | ITSN1    | 1.1E-07 | 0.89  | 0.25    |
| chr15:44543579 | 15 | 44543579  | --     | 2.1E-05 | 0.32  | 0.6    | chr21:37781046 | 21 | 37781046 | CHAF1B   | 3.1E-05 | 0.79  | 0.48    |
| rs893912       | 15 | 66928469  | --     | 3.2E-06 | 1     | 0.01   | rs2267347      | 22 | 37012953 | CACNG2   | 2.7E-05 | 0.83  | 0.043   |
| rs8023562      | 15 | 66941774  | --     | 4.8E-05 | 0.56  | 0.039  | rs73166104     | 22 | 43705158 | SCUBE1   | 2.8E-05 | 0.038 | 0.0081  |
| rs7169032      | 15 | 67259899  | --     | 5.0E-02 | 0.93  | 0.6    | rs2858527      | 22 | 49716886 | --       | 2.0E-05 | 0.47  | 0.017   |
| chr16:52730910 | 16 | 52730910  | --     | 8.8E-04 | 0.24  | 0.011  | rs848732       | 22 | 49737239 | --       | 1.8E-06 | 0.39  | 0.046   |
| rs2398144      | 16 | 56352854  | GNAO1  | 3.0E-05 | 0.48  | 0.25   | rs708444       | 22 | 49740513 | --       | 3.1E-04 | 0.25  | 0.0026  |
| rs1061238      | 16 | 88781850  | FAM38A | 1.3E-04 | 0.28  | 0.05   |                |    |          |          |         |       |         |

<sup>a</sup> P-values from Phase 1 GWAS (N=385). <sup>b</sup> P-values from Phase 2 replication in OCAC (N=706). <sup>c</sup> P-values from pooled Phase 1 and 2, removing ineligible samples from Phase 1 (N=985).

**Supplementary Table 2.** Chromosome 9 *TTC39B* fine-mapping SNPs

| SNP        | BP       | MA<br>F | R <sup>2,a</sup> | P_Phase<br>1 | P_Phase<br>2 | P_pooled | SNP        | BP       | MA<br>F | R <sup>2,a</sup> | P_Phase<br>1 | P_Phase<br>2 | P_pooled |
|------------|----------|---------|------------------|--------------|--------------|----------|------------|----------|---------|------------------|--------------|--------------|----------|
| rs7874043  | 15249431 | 0.02    | 1                | 7.89E-04     | 0.000069     | 3.60E-07 | rs12684860 | 15210451 | 0.2     | 0.015            | 0.922        | 0.2          | 0.22     |
| rs72700653 | 15249050 | 0.02    | 0.896            | 7.83E-04     | 0.00019      | 3.50E-07 | rs10961939 | 15256956 | 0.14    | 0.012            | 0.783        | 0.54         | 0.39     |
| rs7023109  | 15268991 | 0.04    | 0.456            | 0.134        | 0.00017      | 1.20E-04 | rs7875255  | 15290174 | 0.14    | 0.012            | 0.890        | 0.27         | 0.17     |
| rs10122202 | 15279848 | 0.04    | 0.378            | 0.107        | 0.003        | 1.30E-03 | rs562177   | 15283433 | 0.23    | 0.01             | 0.427        | 0.46         | 0.62     |
| rs80137366 | 15282029 | 0.03    | 0.331            | 0.106        | 0.0021       | 1.40E-03 | rs569078   | 15205014 | 0.34    | 0.008            | 0.677        | 0.4          | 0.56     |
| rs10961955 | 15284640 | 0.04    | 0.279            | 0.007        | 0.074        | 1.60E-03 | rs10961916 | 15212828 | 0.4     | 0.006            | 0.899        | 0.29         | 0.64     |
| rs12003180 | 15283097 | 0.04    | 0.251            | 0.014        | 0.063        | 1.20E-03 | rs10810360 | 15188743 | 0.3     | 0.005            | 0.488        | 0.0093       | 0.01     |
| rs7037559  | 15282851 | 0.05    | 0.251            | 0.015        | 0.0045       | 1.50E-03 | rs693196   | 15202417 | 0.26    | 0.005            | 0.328        | 0.016        | 0.01     |
| rs12345299 | 15247714 | 0.09    | 0.171            | 0.321        | 0.048        | 2.50E-02 | rs10961949 | 15276926 | 0.07    | 0.004            | 0.192        | 0.084        | 0.06     |
| rs72700650 | 15248864 | 0.08    | 0.137            | 0.723        | 0.076        | 6.10E-02 | rs12341152 | 15235161 | 0.06    | 0.004            | 0.459        | 1            | 0.77     |
| rs10120504 | 15277905 | 0.1     | 0.1              | 0.040        | 0.00091      | 4.00E-04 | rs11791131 | 15216292 | 0.12    | 0.004            | 0.590        | 0.75         | 0.67     |
| rs471364   | 15289578 | 0.11    | 0.089            | 0.801        | 0.28         | 0.15     | rs583204   | 15299715 | 0.1     | 0.003            | 0.435        | 0.15         | 0.89     |
| rs3933784  | 15287247 | 0.11    | 0.089            | 0.824        | 0.2          | 0.26     | rs10961934 | 15248194 | 0.09    | 0.002            | 0.983        | 0.53         | 0.75     |
| rs4237138  | 15286386 | 0.11    | 0.087            | 0.828        | 0.25         | 0.14     | rs7467520  | 15201034 | 0.39    | 0.002            | 0.158        | 0.14         | 0.06     |
| rs10756655 | 15250501 | 0.5     | 0.07             | 0.046        | 0.99         | 0.81     | rs619105   | 15240454 | 0.49    | 0.002            | 0.507        | 0.87         | 0.84     |
| rs10810373 | 15293620 | 0.36    | 0.039            | 0.088        | 0.4          | 0.37     | rs13300482 | 15260948 | 0.1     | 0.002            | 0.942        | 0.46         | 0.84     |
| rs612183   | 15282158 | 0.23    | 0.033            | 0.975        | 0.18         | 0.2      | rs552693   | 15267981 | 0.34    | 0.002            | 0.079        | 0.016        | 0.04     |
| rs10810364 | 15218408 | 0.29    | 0.022            | 0.223        | 0.23         | 0.15     | rs1575469  | 15180751 | 0.24    | 0.001            | 0.205        | 0.88         | 0.46     |
| rs10810367 | 15270247 | 0.25    | 0.015            | 0.368        | 0.25         | 0.37     | rs1407977  | 15188106 | 0.4     | 0.001            | 0.168        | 0.25         | 0.05     |
| rs7024176  | 15191562 | 0.3     | 0.015            | 0.339        | 0.18         | 0.32     | rs4087078  | 15297398 | 0.47    | 0.001            | 0.166        | 1            | 0.95     |

<sup>a</sup> R<sup>2</sup> indicates LD between the corresponding SNP with rs7874043.

**Supplementary Table 3.** Description, study design and patient ascertainment for all OCAC sites participating in the replication stage.

| Site (Country)               | Study Name                                               | Design           | Age Range | Sample size (restricted chemo/all chemo) | Design Exclusion Criteria                                                                                                                                                                     | Ascertainment                                                                                                                                                                                                               | Definition of Progression Free Survival                                                                                                                                                                                                                      |
|------------------------------|----------------------------------------------------------|------------------|-----------|------------------------------------------|-----------------------------------------------------------------------------------------------------------------------------------------------------------------------------------------------|-----------------------------------------------------------------------------------------------------------------------------------------------------------------------------------------------------------------------------|--------------------------------------------------------------------------------------------------------------------------------------------------------------------------------------------------------------------------------------------------------------|
| AOCS/ACS (as AUS, Australia) | Australian Ovarian Cancer Study/ Australian Cancer Study | Population-based | 19-79     | 408/648                                  | Previous ovarian cancer, non-epithelial ovarian cancer                                                                                                                                        | Diagnosed from 2002 onwards; recruited through surgical treatment centers throughout Australia & cancer registries of Queensland S. Australia & W. Australia (AOCS) & cancer registries of New South Wales & Victoria (ACS) | The time interval between the date of histologic diagnosis and the first confirmed sign of disease recurrence, or progression, defined by the Gynaecologic Cancer InterGroup (GCIG), based on CA125 and incorporating RECIST, as previously described (1, 2) |
| BAV (Germany)                | Bavarian Ovarian Cancer Cases and Controls               | Hospital-based   | 19-88     | 57/73                                    | Non-epithelial ovarian cancer                                                                                                                                                                 | Cases were patients at the Gynecologic Oncology Center at the Comprehensive Cancer Center Erlangen-Nuremberg, Department of Gynecology and Obstetrics, Erlangen University Hospital.                                        | Same as AOCS                                                                                                                                                                                                                                                 |
| BEL (Belgium)                | Belgian Ovarian Cancer Study                             | Hospital-based   | 14-85     | 39/67                                    | Unverified or non-epithelial ovarian cancer; cases unable to provide blood sample or too ill to participate; patients not able to read or speak Dutch, French or English and sign the consent | Cases attending the Gynecologic Oncology Unit at the Leuven University Hospital diagnosed with incident ovarian cancer from 2009 onwards                                                                                    | Same as AOCS                                                                                                                                                                                                                                                 |

|                                                                      |                                                                                                                                                                                                                                                                                                         |                |              |         |                                                                                                                                                                                                                                                                                                                                 |                                                                                                                                                                                                                                                                                                                                     |                                                                                                                                                                                                                                                                                           |
|----------------------------------------------------------------------|---------------------------------------------------------------------------------------------------------------------------------------------------------------------------------------------------------------------------------------------------------------------------------------------------------|----------------|--------------|---------|---------------------------------------------------------------------------------------------------------------------------------------------------------------------------------------------------------------------------------------------------------------------------------------------------------------------------------|-------------------------------------------------------------------------------------------------------------------------------------------------------------------------------------------------------------------------------------------------------------------------------------------------------------------------------------|-------------------------------------------------------------------------------------------------------------------------------------------------------------------------------------------------------------------------------------------------------------------------------------------|
| HSK (Germany)                                                        | Dr. Horst-Schmidt Kliniken, Wiesbaden                                                                                                                                                                                                                                                                   | Hospital-based | 17-92        | 77/114  | Non- ovarian cancer                                                                                                                                                                                                                                                                                                             | Cases attending the Gynecologic Oncology Unit at the Dr. Horst-Schmidt Kliniken, Wiesbaden, diagnosed with incident ovarian cancer between 2005-2009                                                                                                                                                                                | Same as AOCS                                                                                                                                                                                                                                                                              |
| The International Collaborative Ovarian Neoplasm study (ICON7) trial | A randomised 2 arm, multi-centre, Gynecologic Cancer InterGroup (GCIg) open-label phase III trial designed to evaluate the safety and efficacy of adding bevacizumab, to standard chemotherapy (carboplatin and paclitaxel), in patients with advanced epithelial ovarian or primary peritoneal cancer. | Clinical trial | 27-77        | 124/265 | Patients with non-epithelial ovarian cancer, including malignant mixed Mullerian tumours, borderline tumours (tumours of low malignant potential), planned intraperitoneal cytotoxic chemotherapy, prior systemic anti-cancer therapy for ovarian cancer, surgery within 4 weeks prior to anticipated first dose of bevacizumab | Patients were enrolled between 2006 and 2009 at 263 centers in the United Kingdom, Germany, France, Canada, Australia, New Zealand, Denmark, Finland, Norway, Sweden, and Spain; and were randomly assigned in a 1:1 ratio to receive carboplatin-paclitaxel (standard-chemotherapy group), or to the same regimen plus bevacizumab | Disease progression was defined according to the Response Evaluation Criteria in Solid Tumors (RECIST) guidelines on the basis of radiologic, clinical, or symptomatic indicators of progression and did not include isolated asymptomatic progression on the basis of CA-125 levels (3). |
| LAX (USA)                                                            | Women's Cancer Research Institute (Cedars-Sinai Medical Center)                                                                                                                                                                                                                                         | Hospital-based | 18 and above | 87/177  | Non-epithelial ovarian cancer                                                                                                                                                                                                                                                                                                   | Cases are identified through the Women's Cancer Research Institute biorepository from 1989 onwards. Patients presenting to the gynecologic cancer service with epithelial ovarian                                                                                                                                                   | Same as AOCS                                                                                                                                                                                                                                                                              |

|                |                                                 |                               |       |         |                                                                                                                                                 |                                                                                                                                                                                                                                                     |                                                                                                                                                                                                                                                             |
|----------------|-------------------------------------------------|-------------------------------|-------|---------|-------------------------------------------------------------------------------------------------------------------------------------------------|-----------------------------------------------------------------------------------------------------------------------------------------------------------------------------------------------------------------------------------------------------|-------------------------------------------------------------------------------------------------------------------------------------------------------------------------------------------------------------------------------------------------------------|
|                |                                                 |                               |       |         |                                                                                                                                                 | cancer are identified in IRB 901 (Tissue Bank) and IRBs 1080 and 4049 (Gilda Radner Hereditary Cancer)                                                                                                                                              |                                                                                                                                                                                                                                                             |
| MAL (Denmark)  | The Danish Malignant Ovarian Tumor Study        | Population-based              | 35-79 | 84/228  | Unverified or non-epithelial ovarian cancer; cases unable to provide blood sample or too ill to participate                                     | Incident cases diagnosed 1994 -1999 from municipalities of Copenhagen & Frederiksberg & surrounding counties.                                                                                                                                       | The time interval was determined by ultrasonography, or defined by cancer antigen 125 (CA125) values (increase in CA125 to >35 U/mL from a CA125 value lower than 35 U/mL after the primary treatment)                                                      |
| MAYO/MAC (USA) | Mayo Clinic Ovarian Cancer Case Control Study   | Clinic-based                  | >20   | 71/307  | Previous ovarian cancer, non-epithelial ovarian cancer                                                                                          | Cases attending Mayo Clinic diagnosed from 2000 onwards identified in a six state surrounding region.                                                                                                                                               | The time interval between the date of histologic diagnosis and progression, defined as radiographic evidence of recurrence or initiation of second-line therapy.                                                                                            |
| ORE (USA)      | Oregon Ovarian Cancer Registry                  | Mixed                         | 20-80 | 17/32   | Prior history of ovarian cancer                                                                                                                 | Cases diagnosed from 2007, identified from the cancer registry, and a tissue repository of patients with ovarian cancer.                                                                                                                            | Same as AOCS                                                                                                                                                                                                                                                |
| PVD (Denmark)  | Pelvic Mass Study                               | Hospital-based                | 31-88 | 0/144   | Unverified diagnosis of ovarian cancer or previous diagnosed ovarian cancer; cases unable to provide blood sample                               | All patients admitted with a pelvic mass at Rigshospitalet, University of Copenhagen, are included in the study with a blood sample less than 14 days before surgery/diagnosis of ovarian cancer and with FFPE and fresh frozen tissues if possible | Same as MAL                                                                                                                                                                                                                                                 |
| SCO (UK)       | The Scottish Randomized Trial in Ovarian Cancer | Hospital-based/Clinical trial | 18-84 | 216/487 | Adenocarcinomas of unknown origin; Prior history of cancer within 5 years (except localized cervical or non-melanoma skin cancer) or concurrent | Patients randomized into a prospective phase III comparison of paclitaxel-carboplatin versus docetaxel-carboplatin as first line chemotherapy in stage Ic-IV epithelial ovarian cancer (SCOTROC                                                     | The time interval between the date of histologic diagnosis and progression, defined as (i) a 25% or greater increase in the size of at least 1 bi- or uni-dimensionally measurable lesion, (ii) a clear worsening from previous assessment of any evaluable |

|  |  |  |  |  |                                                                                                                                                                                                                                                       |                                             |                                                                                                                                                                                                                                                                                                                                   |
|--|--|--|--|--|-------------------------------------------------------------------------------------------------------------------------------------------------------------------------------------------------------------------------------------------------------|---------------------------------------------|-----------------------------------------------------------------------------------------------------------------------------------------------------------------------------------------------------------------------------------------------------------------------------------------------------------------------------------|
|  |  |  |  |  | <p>malignancy; FIGO stages other than 1c to IV; Treatment with chemo- or radiotherapy prior to RCT; Advanced disease defined by inadequate bone marrow, renal or liver function or severe co-morbidities that contraindicate trial participation.</p> | <p>1) which recruited from 1998 to 2000</p> | <p>disease (note that worsening of existing non-evaluable disease did not constitute progression), (iii) the reappearance of any lesion that had disappeared, with the exception of ascitic or pleural fluid that was drained and recurred within 3 months of drainage, or (iv) the appearance of any new lesion and/or site.</p> |
|--|--|--|--|--|-------------------------------------------------------------------------------------------------------------------------------------------------------------------------------------------------------------------------------------------------------|---------------------------------------------|-----------------------------------------------------------------------------------------------------------------------------------------------------------------------------------------------------------------------------------------------------------------------------------------------------------------------------------|

**Supplementary Table 4.** Correlation between expression of *PSIP1* and other genes on the short arm of chr 9 in TCGA from cBioPortal.

| Gene            | Pearson Score | Spearman Score | Adjusted Score <sup>1</sup> |
|-----------------|---------------|----------------|-----------------------------|
| <i>HAUS6</i>    | 0.72          | 0.72           | 0.32                        |
| <i>SNAPC3</i>   | 0.67          | 0.68           | 0.21                        |
| <i>CNTLN</i>    | 0.66          | 0.65           | 0.60                        |
| <i>NFIB</i>     | 0.62          | 0.64           | 0.37                        |
| <i>CCDC171</i>  | 0.62          | 0.61           | 0.44                        |
| <i>UHRF2</i>    | 0.58          | 0.56           | 0.36                        |
| <i>KIF24</i>    | 0.56          | 0.58           | 0.51                        |
| <i>DENND4C</i>  | 0.56          | 0.56           | 0.17                        |
| <i>FANCG</i>    | 0.55          | 0.56           | 0.35                        |
| <i>KIAA0020</i> | 0.55          | 0.55           | 0.40                        |
| <i>MTAP</i>     | 0.55          | 0.58           | 0.16                        |
| <i>MPDZ</i>     | 0.55          | 0.53           | 0.41                        |
| <i>ZDHHC21</i>  | 0.55          | 0.56           | 0.31                        |
| <i>PLAA</i>     | 0.54          | 0.55           | 0.21                        |
| <i>RRAGA</i>    | 0.54          | 0.55           | 0.05                        |
| <i>DCAF12</i>   | 0.53          | 0.52           | 0.36                        |
| <i>UBE2R2</i>   | 0.53          | 0.54           | 0.47                        |
| <i>RFX3</i>     | 0.53          | 0.52           | 0.52                        |
| <i>IFT74</i>    | 0.53          | 0.54           | 0.39                        |
| <i>TOPORS</i>   | 0.52          | 0.52           | 0.31                        |
| <i>KLHL9</i>    | 0.52          | 0.56           | 0.21                        |
| <i>MELK</i>     | 0.51          | 0.53           | 0.48                        |
| <i>RCL1</i>     | 0.51          | 0.51           | 0.14                        |
| <i>KIF15</i>    | 0.5           | 0.51           | 0.53                        |
| <i>KIAA2026</i> | 0.5           | 0.49           | 0.40                        |

<sup>1</sup> Correlation between residual expression levels after regressing out effects of copy number and methylation.

**Supplementary Table 5.** Treatment regimens used for cases who did not have standard carboplatin/paclitaxel treatment

| # cases     | Treatment regimen                                                                                |
|-------------|--------------------------------------------------------------------------------------------------|
| 360         | carboplatin IV AUC 5 + docetaxel IV 75 mg/m <sup>2</sup> every 3 weeks                           |
| 233         | paclitaxel and carboplatin - known or assumed standard doses but <4 cycles                       |
| 215         | minimum cytoreductive surgery; chemotherapy data not available or insufficient to assign regimen |
| 141         | standard paclitaxel/carboplatin + bevacizumab                                                    |
| 133         | monotherapy – carboplatin, paclitaxel or other drug                                              |
| 94          | standard paclitaxel/carboplatin + other drug/regimen                                             |
| 71          | carboplatin/paclitaxel and gemzar/topotecan/doxorubicin/cyclophosphamide/other drug              |
| 39          | carboplatin + other drug                                                                         |
| 38          | cisplatin and other drug                                                                         |
| 22          | paclitaxel and carboplatin (non-standard doses)                                                  |
| <b>1346</b> | <b>TOTAL</b>                                                                                     |



**Supplementary Table 6.** Oligonucleotides used in this study.

| <b>3C Primers</b>                 | <b>3C Fragment<br/>(hg19 coordinates)</b> | <b>Sequence (5' to 3')</b>           |
|-----------------------------------|-------------------------------------------|--------------------------------------|
| <i>TTC39B</i> PRE bait            | 15,236,622                                | AATGGCAAAGAATCCCTTAAGCCAATGGG        |
| <i>TTC39B</i> HindIII Fragment 1  | 15,255,800                                | GCAAATCCTAGCAGTCTACTCTGAGGATCCACC    |
| <i>TTC39B</i> HindIII Fragment 2  | 15,256,991                                | GCGGAGAGAGAGGAAAGTGAACGGATGG         |
| <i>TTC39B</i> HindIII Fragment 3  | 15,259,198                                | CAATTTATGGTTTCGAAAGAGAAGGTGTGGAGAAGG |
| <i>TTC39B</i> HindIII Fragment 4  | 15,261,729                                | TGGAATCCTGAGGTGGTGTGAATACAGTGG       |
| <i>TTC39B</i> HindIII Fragment 5  | 15,272,692                                | CCAAGGATGCAGGAACTGTATTTGCTGG         |
| <i>TTC39B</i> HindIII Fragment 6  | 15,276,192                                | TTCGGAAGAGGCAGTTCCCAAAGAGTAAGG       |
| <i>TTC39B</i> HindIII Fragment 7  | 15,280,207                                | TCATACAGTGCCCTCCCTCTCTTGGTATCTATCC   |
| <i>TTC39B</i> HindIII Fragment 8  | 15,282,448                                | ACCCTCTACAACACTCTATGAGCCAGACACTGC    |
| <i>TTC39B</i> HindIII Fragment 9  | 15,283,778                                | CACATCTGGCAGTCACAACCTCTTTAGCCTCC     |
| <i>TTC39B</i> HindIII Fragment 10 | 15,287,301                                | CTGTGCCTCTGGATATAAATGCCCTTAGGAGG     |
| <i>TTC39B</i> HindIII Fragment 11 | 15,288,954                                | CGGTCTTGATTTGTGACACCTAACACTTGTGC     |
| <i>TTC39B</i> HindIII Fragment 12 | 15,291,295                                | AGTTGAACAAAAGGGACCGTCACTGGATCC       |
| <i>TTC39B</i> HindIII Fragment 13 | 15,292,707                                | CCCTGAAGACTGTGACATTGGTGATCCTTACC     |
| <i>TTC39B</i> HindIII Fragment 14 | 15,293,760                                | AAGCAGGCGGTAAAAACATGTCACATAAGCC      |
| <i>TTC39B</i> HindIII Fragment 15 | 15,302,885                                | CCCAATGGTAGCCATAAGTATGTGAAGGTAACC    |
| <i>TTC39B</i> HindIII Fragment 16 | 15,305,022                                | AGGCTAGTACAGGGCTTGGCACCTAGTCAGC      |
| <i>TTC39B</i> HindIII Fragment 17 | 15,305,963                                | TGGTAGGTGCCTTAGAGAAGGCATAGTTTTGCC    |
| <i>TTC39B</i> HindIII Fragment 18 | 15,308,289                                | CATGAAGCCATCTCACTGGTAGCTTCTTCTCC     |
| <i>TTC39B</i> HindIII Fragment 19 | 15,310,861                                | CATTTGACATCCGGGAAGGCTATTTGAAGG       |
| <i>TTC39B</i> HindIII Fragment 20 | 15,316,772                                | GCAAATTGCTTGCCATGATTTAGAACAGTGG      |
| <i>TTC39B</i> HindIII Fragment 21 | 15,318,137                                | TGTTCAAGGTCAGAAACCCAGGTCTCAAGG       |
| <i>PSIP1</i> EcoRI Fragment 1     | 15,498,333                                | CGAACTCAGACCTCAAATACCAATGTCAAAGC     |
| <i>PSIP1</i> EcoRI Fragment 2     | 15,499,347                                | GTACACACTTAGGGCTTCAACGTGTGTGCC       |
| <i>PSIP1</i> EcoRI Fragment 3     | 15,502,942                                | AGACCAACATACATATGGGGCAGCACTGC        |
| <i>PSIP1</i> EcoRI Fragment 4     | 15,504,215                                | CCACCTGTTTCCACTGTTGTTTCTTTGCAG       |
| <i>PSIP1</i> EcoRI Fragment 5     | 15,506,988                                | CCTCATGTGATTTCAGGCACATCAGTGAAGG      |
| <i>PSIP1</i> EcoRI Fragment 6     | 15,515,153                                | CCTTCATCACGATTTTGGTGATGTCTGTTAGG     |
| <i>PSIP1</i> EcoRI Fragment 7     | 15,519,608                                | CCTGGATTACGATCACAGCAGAAAGCTCC        |
| <i>PSIP1</i> EcoRI Fragment 8     | 15,522,834                                | CTCTGGGTTAAATGGCCAGAAGTATCATTACTGG   |

|                                 |            |                                     |
|---------------------------------|------------|-------------------------------------|
| <i>CCDC171</i> EcoRI Fragment 1 | 15,522,834 | CTCTGGGTAAATGGCCAGAAGTATCATTACTGG   |
| <i>CCDC171</i> EcoRI Fragment 2 | 15,526,937 | CCCTGATCGACAAAGACATTGGAACCTAATAACC  |
| <i>CCDC171</i> EcoRI Fragment 3 | 15,532,663 | CACAGGTGTGGTTACTAATGAAGACAGCACTGC   |
| <i>CCDC171</i> EcoRI Fragment 4 | 15,554,784 | CTGAGATCAGCATTCCCTGATCTCATTTAATCCC  |
| <i>CCDC171</i> EcoRI Fragment 5 | 15,559,223 | AGTTGCAAGGAACAGGGAGAAGTCAGTGG       |
| <i>CCDC171</i> EcoRI Fragment 6 | 15,564,215 | CACAGACTTTTGTGGTCCAAATTAACAGAGGAGC  |
| <i>FREM1</i> EcoRI Fragment 1   | 14,891,207 | TGAGGTCTTGTGGGAGGGAGATTTATAATCAGG   |
| <i>FREM1</i> EcoRI Fragment 2   | 14,892,041 | GTTGGAAGCCTCTTCAGTATCATCCCTTTGG     |
| <i>FREM1</i> EcoRI Fragment 3   | 14,893,250 | CCTAGGCCCGCATTCTATCCTGAGGTATCC      |
| <i>FREM1</i> EcoRI Fragment 4   | 14,901,788 | CTATCTGCCACAAATGAATAAGGGCCTGG       |
| <i>FREM1</i> EcoRI Fragment 5   | 14,912,492 | AGGCATTGGCTATGCCTTTCAGAGAATGC       |
| <i>FREM1</i> EcoRI Fragment 6   | 14,915,962 | GCCACTGGCCTTATGCTGTATTCAATTTCC      |
| <i>FREM1</i> EcoRI Fragment 7   | 14,924,529 | CCCTGAATACTGGGAAGAGTGCTGATACCACAG   |
| <i>CER1</i> EcoRI Fragment 1    | 14,699,514 | ACATCGTGGGAAGCCTCAGCCTTAGG          |
| <i>CER1</i> EcoRI Fragment 2    | 14,701,925 | TGAGTTTGGTAGGTCTTGCTACCTGAAGCAGC    |
| <i>CER1</i> EcoRI Fragment 3    | 14,708,516 | CAGGAGGATCAAAAAGGGTTAGGAGAACAGC     |
| <i>CER1</i> EcoRI Fragment 4    | 14,712,481 | ACAGAGAGACTGTTCCAATGGGTGAAGATGG     |
| <i>CER1</i> EcoRI Fragment 5    | 14,721,023 | AGGCAGGCATCATTCTGTACTAATCAGGG       |
| <i>CER1</i> EcoRI Fragment 6    | 14,727,139 | GGTGGAGTCAGAGGAAGATCAACCTTTTCG      |
| <i>CER1</i> EcoRI Fragment 7    | 14,728,260 | TCTCATGACTCTGTAAGGCTGGGGAAACC       |
| <i>CER1</i> EcoRI Fragment 8    | 14,736,783 | CGTAGGTGCTCCTACCACCTTAGTCTGAGTGAAGC |
| <i>ZDHC21</i> Fragment 1        | 14,676,585 | CGGTTAAGAGAGTCTCTGAAATGGGGAAGAAGG   |
| <i>ZDHC21</i> Fragment 2        | 14,688,063 | GTACCTCGTAGGCAAAAGTGACACGGTCC       |
| <i>ZDHC21</i> Fragment 3        | 14,690,797 | AGCTGTGGGTTTACAGGTAGGGCAATGACC      |
| <i>ZDHC21</i> Fragment 4        | 14,691,752 | TCAGTTCTGTCAATTGGATTGCCAAGTCG       |
| <i>ZDHC21</i> Fragment 5        | 14,695,787 | AGGCAATCTCCCTCCACTATATCCTCCTCC      |
| <i>ZDHC21</i> Fragment 6        | 14,699,514 | GTTACATGGATGCAACAGCAAATAGAGATGC     |
| <i>ZDHC21</i> Fragment 7        | 14,701,924 | GTGTGAGTTTGGTAGGTCTTGCTACCTGAAGC    |
| <i>NF1B</i> EcoRI Fragment 1    | 14,299,060 | GCTCTTTGCACTCTTTGCAAACCTTGGAGC      |
| <i>NF1B</i> EcoRI Fragment 2    | 14,300,723 | CAAGGTCTTTCTCCTCATAAGCTCTCACTCAGC   |
| <i>NF1B</i> EcoRI Fragment 3    | 14,305,724 | CGTTCCTTTGACTTTGCTGTCAATGCTGC       |
| <i>NF1B</i> EcoRI Fragment 4    | 14,310,338 | TGTTACTCAGCATTAGGAAACAGTCACACTTGGG  |
| <i>NF1B</i> EcoRI Fragment 5    | 14,319,007 | TCTGCTCTCTGATTCAACAGTGGTAAATCCAGG   |

|                                |            |                                    |
|--------------------------------|------------|------------------------------------|
| <i>NF1B</i> EcoRI Fragment 6   | 14,327,455 | GAAGGCCTTCATATCACGAATGCAGAGATCC    |
| <i>NF1B</i> EcoRI Fragment 7   | 14,334,074 | GTCATTTTGAAGACCTTTGGCATCCATCTGG    |
| <i>SNAPC3</i> EcoRI Fragment 1 | 15,409,202 | GGGTAGATGCCTCATGAATGGGATTAGAGTCC   |
| <i>SNAPC3</i> EcoRI Fragment 2 | 15,411,986 | CTTGCTTTTGTATGTCCACGTGCATGG        |
| <i>SNAPC3</i> EcoRI Fragment 3 | 15,413,722 | GTTACATGGAGGCTAAGACCCAAATGACTGC    |
| <i>SNAPC3</i> EcoRI Fragment 4 | 15,416,858 | CAGTGGGTAAGGGCAGGATCAGAATGG        |
| <i>SNAPC3</i> EcoRI Fragment 5 | 15,424,662 | GGAACAAAGAGGGAGTGACACTTTTACTCTTAGG |
| <i>SNAPC3</i> EcoRI Fragment 6 | 15,431,783 | CTTCCACATCTTTGTCTGTCCCTCTTTGGG     |
| <i>SNAPC3</i> EcoRI Fragment 7 | 15,440,453 | AGACTATGGGAACCCACCACTGTGTTTCAGC    |

| <b>Luciferase Cloning Primers</b>  | <b>Sequence (5' to 3')</b>                |
|------------------------------------|-------------------------------------------|
| <i>TTC39B</i> alternative prom FOR | CCATGTGGTTGGAGCACAGTATATGC                |
| <i>TTC39B</i> alternative prom REV | CCACACATCTGTTTCCCAACTGTACC                |
| <i>TTC39B</i> PRE WT FOR           | GTCCCTTTTATAGATAGGACATGAATCCCTGG          |
| <i>TTC39B</i> PRE WT REV           | CAGCTTAAGCATTCTAGGGATCTGTACC              |
| <i>TTC39B</i> rs72700653 FOR       | GAATCTGTTCAATAA <u>C</u> ATGACTTTTATTC    |
| <i>TTC39B</i> rs72700653 REV       | GAATAAAAGTCAT <u>G</u> TTATTGAACAGATTC    |
| <i>TTC39B</i> rs7874043 FOR        | GCTATTTCTGAGGACA <u>C</u> GCCACTTTACTAATC |
| <i>TTC39B</i> rs7874043 REV        | GATTAGTAAAGTGG <u>C</u> GTGTCCTCAGAAATAGC |
| <i>PSIP1</i> prom FOR              | TGTTTGAGAGCCTGGGTACCACC                   |
| <i>PSIP1</i> prom REV              | TTCCTAATTCATTTCCAGTTGAGTCCC               |
| <i>CCDC171</i> prom FOR            | CCTTTATTTCTCTGGAGCAATTGTCC                |
| <i>CCDC171</i> prom REV            | CGAGAACGCTGGCTCGGATTGGAAGAGC              |

| <b>RACE and qRT-PCR Primers</b> | <b>Sequence (5' to 3')</b>           |
|---------------------------------|--------------------------------------|
| RACE-1                          | ACGAATTCTCGAGCCATGGCTTTTTTTTTTTTTTTN |
| RACE-2                          | ACGAATTCTCGAGCCATGGC                 |
| 5RTTCExon3REV                   | GCAGAAATGCCGTTCTGGATGTCC             |
| 5RTTCExon2REV                   | GGTTTCCAAGGCATCTTCGAAAACG            |
| 3RTTCExon1BFOR1                 | CAACCGTTGGCTACATTTGATGG              |
| qRTPCRTTCExon1AFOR              | GGGAAATCGAGTAGCTGCACTCAGG            |
| qRTPCRTTCExon1BFOR              | CAACCGTTGGCTACATTTGATGG              |
| qRTPCRTTCExon2REV               | GCAGAAATGCCGTTCTGGATGTCC             |

| <b>Taqman Primers</b> | <b>Sequence (5' to 3')</b> |
|-----------------------|----------------------------|
| TTC39B-202BFOR        | TTGCTTTATTTGAACACGGTTCC    |
| TTC39B-202BREV        | GTGAGAAGATATTGAGATGGTTTCCA |
| TTC39B-202BFAM        | AACGTCCTACACTTGTGCCA       |

  

| <b>EMSA Primers</b> | <b>Sequence (5' to 3')</b>     |
|---------------------|--------------------------------|
| rs72700653comFOR    | AATCTGTTCAATAACATGACTTTTATTCA  |
| rs72700653comREV    | TGAATAAAAAGTCATGTTATTGAACAGATT |
| rs72700653minFOR    | AATCTGTTCAATAATATGACTTTTATTCA  |
| rs72700653minREV    | TGAATAAAAAGTCATATTATTGAACAGATT |
| rs7874043comFOR     | TATTTCTGAGGACAAGCCACTTTACTAAT  |
| rs7874043comREV     | ATTAGTAAAGTGGCTTGTCCCTCAGAAATA |
| rs7874043minFOR     | TATTTCTGAGGACACGCCACTTTACTAAT  |
| rs7874043minREV     | ATTAGTAAAGTGGCGTGTCCCTCAGAAATA |
| AP1consensusFOR     | CGCTTGATGACTCAGCCGGAA          |
| AP1consensusREV     | TTCCGGCTGAGTCATCAAGCG          |
| FOXA1consensusFOR   | CTGGTCTTAAAGGTGTTTACCTTGTCTGAT |
| FOXA1consensusREV   | ATCAGACAAGGTAAACACCTTTAAGACCAG |
| Sp1consensusFOR     | ATTCGATCGGGGCGGGGCGAGC         |
| Sp1consensusREV     | GCTCGCCCCGCCCCGATCGAAT         |
| EMSAControlFOR      | AGAGATTGCCTGACGTCAGAGAGCTAG    |
| EMSAControlREV      | CTAGCTCTCTGACGTCAGGCAATCTCT    |

  

| <b>ChIP-qPCR Primers</b> | <b>Sequence (5' to 3')</b> |
|--------------------------|----------------------------|
| ChIPTTCPREFOR            | ACGCAGACCCTGGAGTCTAA       |
| ChIPTTCPREREV            | GGGGGTTATGGTGAGAATCA       |
| ChIPNegControlFOR        | CAACCTGCACCTACCCAGTT       |
| ChIPNegControlREV        | GAACTCGAGACCAGCCTGAC       |

## SUPPLEMENTAL METHODS

### Patient Cohorts

**Australian Ovarian Cancer Study (AOCS) ovarian cancer patients.** The AOCS is a population-based, patient-control study that recruited 1859 women with ovarian, primary peritoneal or ovarian cancer from all Australian states between 2002 and 2006. Clinical data were collected from medical records at pre-specified time points: post-primary surgery/diagnosis, post-primary chemotherapy, at 12 months post diagnosis then at six monthly intervals to five years and annually thereafter. Information included age at diagnosis, primary site of tumor, histological subtype, FIGO stage and grade, residual disease following debulking laparotomy, type and dose of chemotherapy, time to first progression and vital status together with time to event variables. We selected 188 AOCS patients with extreme phenotypes for Phase 1: 94 patients with short PFS (median 10.6 months, 95% CI=[10.1,11.0]), despite having minimal residual disease (residual disease  $\leq$ 1 cm), and 94 with relatively long PFS despite suboptimal debulking (residual disease  $>$ 1 cm) (median 28.8 months, 95% CI=[24.5, 37.9]).

**Mayo Clinic and The Cancer Genome Atlas ovarian cancer patients.** To improve statistical power to detect novel loci associated with PFS, we performed a meta-analysis of GWAS results from AOCS and results from two further cohorts of patients with serous invasive ovarian cancer, from the Mayo Clinic (MAYO) and from The Cancer Genome Atlas (TCGA). The patients from MAYO were from a hospital-based series recruited between 2000-2008. The TCGA patients came from the pilot project, which was initiated in 2006 and for which data are publicly available (<http://cancergenome.nih.gov/>). The data from these two studies were combined for analysis (and are henceforth referred to as the 'MAYO+TCGA set'). Some patients were included in both studies, but these overlaps were detected so that each patient was included in the analysis only once. Apart from the selection on the basis of PFS and residual disease, the patients included from the MAYO and TCGA sets were subject to the same selection criteria as used for selecting AOCS samples.

### Western analysis

Cells growing in 10 cm<sup>2</sup> tissue culture dishes were harvested with 0.25% trypsin and washed in phosphate buffered saline (PBS). Cell pellets were lysed in RIPA buffer [50 mM Tris-HCl, pH 8.0; 150 mM NaCl; 1% IGEPAL CA-630; 0.5% deoxycholate; 0.1% SDS; 1 mM DTT; protease inhibitor cocktail (Roche)] and clarified by centrifugation to remove cell debris. 20-40 micrograms of lysate supernatants were separated by SDS-polyacrylamide gel electrophoresis, electroblotted onto PVDF membranes by semi-dry transfer (Bio-Rad) and blocked in BLOTTO [5% dry milk powder; 0.1% Tween 20; PBS]. Sp1 was detected with 144ng/ml rabbit anti-Sp1 monoclonal antibody (Cell Signaling), PSIP1 was detected with 100 ng/ml of rabbit anti-LEDGF/p75 polyclonal antibody (Bethyl Laboratories) and B-actin was detected with 400 ng/ml of rabbit anti-actin polyclonal antibody (Sigma-Aldrich). Primary antibodies were detected with horseradish peroxidase-conjugated goat anti-rabbit antibody (Cell Signaling). Detected proteins were visualized with enhanced chemiluminescence substrate (Bio-Rad) and the C-DiGit gel documentation system (LI-COR). Primary antibodies were detected with horseradish peroxidase-conjugated goat anti-rabbit antibody (Cell Signaling). Detected proteins were visualized with enhanced chemiluminescence substrate (Bio-Rad) and the LAS-500 gel documentation system (GE Healthcare).

### **5' and 3' Rapid Amplification of cDNA ends (RACE)**

Five micrograms of total RNA was extracted from A2780 ovarian cancer cells using TRIzol and DNaseI (Life Technologies). For 5'RACE, cDNA was synthesized using 2pmol 5RTTCExon3REV and Superscript III (Life Technologies). cDNA was then column purified (Qiagen) and incubated with terminal transferase (New England Biolabs). PCR was performed using RACE-1 primer and 5RTTCExon2REV. For 3'RACE, cDNA was synthesized using 500ng RACE-1 primer and Superscript III. PCR was performed using RACE-2 primer and 3RTTCExon1BFOR1. Primers are listed in Supplementary Table 5 and all PCR products were sequenced verified by AGRF, Australia.

### **Gene expression analysis using quantitative real-time PCR (qRT-PCR)**

*TTC39B-202* and *TTC39B-202B* mRNA levels were measured in A2780 and JAM ovarian cancer cell lines using qRT-PCR and normalized against the housekeeping gene *TATA-binding protein* (TBP). All qRT-PCRs were performed on a RotorGene 6000 using MyTaq HS DNA polymerase with the addition of 5 mM of Syto9, annealing temperature of 62°C and extension of 30sec. Analyses were performed in three independent experiments with each experiment quantified in duplicate. Primers are listed in Supplementary Table 5. *TTC39B-202B* mRNA levels in 18 cell lines and 149 AOCS tumors were measured using qRT-PCR normalized against the housekeeping genes Beta Glucuronidase (GUSB) and Hypoxanthine Phosphoribosyltransferase 1 (HPRT1). Reactions were performed on an ABI7900HT Sequence Detection System (Applied Biosystems). Relative expression was calculated using the (delta-delta) Ct method. Primer and Probe sequences are listed in Supplementary Table 5. RNA was prepared from cell lines and tumor specimens using the RNeasy extraction kit (QIAGEN). RNA was reverse transcribed with MMLV reverse-transcriptase (Life Technologies).

### **Taqman expression assays**

Total RNA was extracted using Trizol (Life Technologies). Residual DNA contaminants were removed by DNase treatment (Ambion) and complementary DNA was synthesized using random primers as per manufacturers' instructions (Life Technologies). All qPCRs were performed on a RotorGene 6000 (Corbett Research) with TaqMan Gene Expression assays (Hs01045711\_g1 for Sp1, Hs00916521\_m1 for *PSIP1*) and TaqMan Universal PCR master mix. All reactions were normalized against *B-glucuronidase* (Catalogue No. 4326320E).

### **Kaplan-Meier (KM) plots**

*TTC39B* expression data for 142 serous EOC tumors obtained through AOCS was derived by qRT-PCR. Patients were grouped according to high or low expression as defined by dichotomisation around the upper decile of expression. Outcome and *CCDC171* (*C9orf93*) expression data, generated by the Agilent microarray platform (probes A\_23\_P350658, A\_24\_P195081, A\_32\_P166478, A\_32\_P166480, A\_32\_P395879, A\_32\_P450587), for 374 patients, for whom information on treatment regimen was available, were extracted from The Cancer Genome Atlas (TCGA) interface (<http://tcga-data.nci.nih.gov/>) Nature 2011; 474:609-15. For either dataset, clinical outcome between groups was compared using Kaplan-Meier analysis followed by two-sided log-rank tests (SPSS v.22, IBM). Cox Proportional Hazards modelling (SPSS) was used to generate hazards ratios (HR) and 95% confidence intervals (95% CI)

## SUPPLEMENTAL REFERENCES

1. Johnatty SE, Beesley J, Paul J, Fereday S, Spurdle AB, Webb PM, et al. ABCB1 (MDR 1) polymorphisms and progression-free survival among women with ovarian cancer following paclitaxel/carboplatin chemotherapy. *Clinical cancer research : an official journal of the American Association for Cancer Research* 2008;14:5594-601.
2. Rustin GJ, Vergote I, Eisenhauer E, Pujade-Lauraine E, Quinn M, Thigpen T, et al. Definitions for response and progression in ovarian cancer clinical trials incorporating RECIST 1.1 and CA 125 agreed by the Gynecological Cancer Intergroup (GCIg). *International journal of gynecological cancer : official journal of the International Gynecological Cancer Society* 2011;21:419-23.
3. Perren TJ, Swart AM, Pfisterer J, Ledermann JA, Pujade-Lauraine E, Kristensen G, et al. A phase 3 trial of bevacizumab in ovarian cancer. *The New England journal of medicine* 2011;365:2484-96.
